# Supplementary material for: What works for whom and why? Treatment effects and their moderators among forcibly displaced people receiving psychological and psychosocial interventions: study protocol for an individual patient data meta-analysis
Source: PubMed Central journal article supplement — BMJ Open. 2024 Feb 2;14(2):e078473. doi: 10.1136/bmjopen-2023-078473 (PMC10840047; doi:10.1136/bmjopen-2023-078473), 2024-02-02
Supplement: bmjopen-2023-078473.draft_revisions.pdf [file bmjopen-2023-078473.draft_revisions.pdf]

# BMJ Open

BMJ Open is committed to open peer review. As part of this commitment we make the peer review history of every article we publish publicly available.

When an article is published we post the peer reviewers' comments and the authors' responses online. We also post the versions of the paper that were used during peer review. These are the versions that the peer review comments apply to.

The versions of the paper that follow are the versions that were submitted during the peer review process. They are not the versions of record or the final published versions. They should not be cited or distributed as the published version of this manuscript.

BMJ Open is an open access journal and the full, final, typeset and author-corrected version of record of the manuscript is available on our site with no access controls, subscription charges or pay-per-view fees (<http://bmjopen.bmj.com>).

If you have any questions on BMJ Open's open peer review process please email [info.bmjopen@bmj.com](mailto:info.bmjopen@bmj.com)

# BMJ Open

## What works for whom and why? Treatment effects and their moderators among forcibly displaced people receiving psychological and psychosocial interventions: study protocol of a series of individual patient data meta-analyses

|                               |                                                                                                                                                                                                                                                                                                                                                                                                                                                                                                                                                                                                                                                                                                                                                                                                                                                                                                                                                                                                                                                                                                                                                                                                                                                                                                                                                                                                                                                                                                    |
|-------------------------------|----------------------------------------------------------------------------------------------------------------------------------------------------------------------------------------------------------------------------------------------------------------------------------------------------------------------------------------------------------------------------------------------------------------------------------------------------------------------------------------------------------------------------------------------------------------------------------------------------------------------------------------------------------------------------------------------------------------------------------------------------------------------------------------------------------------------------------------------------------------------------------------------------------------------------------------------------------------------------------------------------------------------------------------------------------------------------------------------------------------------------------------------------------------------------------------------------------------------------------------------------------------------------------------------------------------------------------------------------------------------------------------------------------------------------------------------------------------------------------------------------|
| Journal:                      | <i>BMJ Open</i>                                                                                                                                                                                                                                                                                                                                                                                                                                                                                                                                                                                                                                                                                                                                                                                                                                                                                                                                                                                                                                                                                                                                                                                                                                                                                                                                                                                                                                                                                    |
| Manuscript ID                 | bmjopen-2023-078473                                                                                                                                                                                                                                                                                                                                                                                                                                                                                                                                                                                                                                                                                                                                                                                                                                                                                                                                                                                                                                                                                                                                                                                                                                                                                                                                                                                                                                                                                |
| Article Type:                 | Protocol                                                                                                                                                                                                                                                                                                                                                                                                                                                                                                                                                                                                                                                                                                                                                                                                                                                                                                                                                                                                                                                                                                                                                                                                                                                                                                                                                                                                                                                                                           |
| Date Submitted by the Author: | 02-Aug-2023                                                                                                                                                                                                                                                                                                                                                                                                                                                                                                                                                                                                                                                                                                                                                                                                                                                                                                                                                                                                                                                                                                                                                                                                                                                                                                                                                                                                                                                                                        |
| Complete List of Authors:     | <p>Kurath, Jennifer; University of Zurich, Department of Consultation-Liaison Psychiatry and Psychosomatic Medicine, University Hospital Zurich; University of Zurich, Faculty of Medicine</p> <p>Akhtar, Aemal; Karolinska Institute, Division of Insurance Medicine, Department of Clinical Neuroscience; University of New South Wales, School of Psychology</p> <p>Karyotaki, Eirini ; Vrije Universiteit Amsterdam, Department of Clinical, Neuro- and Developmental Psychology, WHO Collaborating Center for Research and Dissemination of Psychological Interventions, Amsterdam Public Health Institute</p> <p>Sijbrandij, Marit; Vrije Universiteit Amsterdam, Department of Clinical, Neuro- and Developmental Psychology, WHO Collaborating Center for Research and Dissemination of Psychological Interventions, Amsterdam Public Health Institute</p> <p>Cuijpers, Pim; Vrije Universiteit Amsterdam, Department of Clinical, Neuro- and Developmental Psychology, WHO Collaborating Center for Research and Dissemination of Psychological Interventions, Amsterdam Public Health Institute</p> <p>Bryant, Richard ; University of New South Wales, School of Psychology</p> <p>Morina, Naser; University of Zurich, Department of Consultation-Liaison Psychiatry and Psychosomatic Medicine, University Hospital Zurich</p> <p>Department of Consultation-Liaison Psychiatry and Psychosomatic Medicine, University Hospital Zurich; University of Zurich, Faculty of Medicine</p> |
| Keywords:                     | Health Equity, Patients, PSYCHIATRY, Psychometrics, Quality of Life, Randomized Controlled Trial                                                                                                                                                                                                                                                                                                                                                                                                                                                                                                                                                                                                                                                                                                                                                                                                                                                                                                                                                                                                                                                                                                                                                                                                                                                                                                                                                                                                   |
|                               |                                                                                                                                                                                                                                                                                                                                                                                                                                                                                                                                                                                                                                                                                                                                                                                                                                                                                                                                                                                                                                                                                                                                                                                                                                                                                                                                                                                                                                                                                                    |

SCHOLARONE™  
Manuscripts

**STUDY PROTOCOL FOR AN IPD-MA ON FORCIBLY DISPLACED PEOPLE**

1

1  
2  
3  
4 What works for whom and why? Treatment effects and their moderators among forcibly displaced  
5  
6 people receiving psychological and psychosocial interventions: study protocol of a series of  
7  
8 individual patient data meta-analyses  
9

10  
11  
12  
13  
14 Jennifer Kurath<sup>1,2</sup>, Aemal Akhtar<sup>3,4</sup>, Eirini Karyotaki<sup>5</sup>, Marit Sijbrandij<sup>5</sup>, Pim Cuijpers<sup>5</sup>, Richard Bryant<sup>4</sup>,  
15  
16 Naser Morina<sup>1,2</sup>  
17

18  
19  
20  
21  
22  
23 <sup>1</sup> Department of Consultation-Liaison Psychiatry and Psychosomatic Medicine, University Hospital  
24 Zurich, University of Zurich, Zurich, Switzerland  
25

26  
27  
28 <sup>2</sup> Faculty of Medicine, University of Zurich, Zurich, Switzerland  
29

30  
31  
32  
33 <sup>3</sup> Division of Insurance Medicine, Department of Clinical Neuroscience, Karolinska Institute,  
34 Stockholm, Sweden  
35

36  
37  
38 <sup>4</sup> School of Psychology, University of New South Wales, Sydney, Australia  
39

40  
41  
42  
43  
44  
45  
46  
47  
48 <sup>5</sup> Department of Clinical, Neuro- and Developmental Psychology, WHO Collaborating Center for  
49 Research and Dissemination of Psychological Interventions, Amsterdam Public Health Institute, Vrije  
50 Universiteit Amsterdam, Amsterdam, the Netherlands  
51

52  
53  
54  
55  
56  
57  
58  
59  
60  
Correspondence to Jennifer Kurath, M.Sc. (jennifer.kurath@usz.ch)

## STUDY PROTOCOL FOR AN IPD-MA ON FORCIBLY DISPLACED PEOPLE

2

1 Abstract

2 **Introduction:** Due to ongoing wars more than 110 million people worldwide have been forced to  
3 flee their homes. Forcibly displaced people (FDP) are exposed to many stressors before, during, and  
4 after displacement resulting in a high risk of developing mental disorders such as post-traumatic  
5 stress (PTS) disorder. Providing adequate mental healthcare for FDP is crucial but despite overall  
6 efficacy of existing interventions in reducing PTS symptoms, a large proportion of FDP do not benefit  
7 from treatment, highlighting the necessity of further investigating factors contributing to individual  
8 differences in treatment trajectories. Yet, the few studies that have explored moderators of  
9 treatment effects in this population often lack sufficient statistical power. Therefore, the present  
10 Individual Patient Data meta-analysis (IPD-MA) will investigate treatment effects and their  
11 moderators - variables related to beneficiaries, providers, intervention, and study characteristics in  
12 relation to PTS outcomes.

13 **Methods and analysis:** After a systematic literature search, articles will be screened for eligibility.  
14 Randomised controlled trials on adult FDP receiving psychological and psychosocial interventions  
15 aimed at alleviating PTS symptoms compared to a non-active control will be included in this IPD-MA.  
16 Subsequently, authors will be contacted to request individual patient data. All datasets obtained will  
17 be synthesised into one large dataset which will be analysed using a one-stage approach by  
18 conducting mixed-effect linear regression models.

19 **Ethics and dissemination:** We issued a clarification of responsibility for which the local ethic  
20 committee of the canton of Zurich, Switzerland, confirmed that this IPD-MA does not require ethical  
21 approval. The results will be published in international peer-reviewed journals.

22 The protocol of this IPD-MA has prospectively been registered on PROSPERO  
23 ([https://www.crd.york.ac.uk/prospero/display\\_record.php?RecordID=299510](https://www.crd.york.ac.uk/prospero/display_record.php?RecordID=299510)).

24

1  
2  
3  
4 25 Strengths and limitations of this study  
5  
6

- 7 26 • This is the first individual patient data (IPD) meta-analysis of treatment effects and their  
8  
9 27 moderators among forcibly displaced people receiving psychological and psychosocial  
10  
11 28 support.  
12  
13  
14 29 • IPD, compared to aggregate data meta-analysis, will allow more complex analyses to identify  
15  
16 30 moderators of treatment effects while standardisation of variables is facilitated, and missing  
17  
18 31 values can be accounted for.  
19  
20  
21 32 • This study can contribute important information towards identifying factors that affect  
22  
23 33 treatment trajectories, attendance, drop-out, and adverse effects.  
24  
25 34 • IPD meta-analysis is limited by the availability of IPD and their quality.  
26  
27  
28 35

**STUDY PROTOCOL FOR AN IPD-MA ON FORCIBLY DISPLACED PEOPLE**

4

36 Introduction

37 According to the United Nations High Commissioner for Refugees (UNHCR, 2023a), an  
38 unprecedented 108.4 million people worldwide have been forced to flee their homes at the end of  
39 2022 as a result of persecution, conflict, violence, and other reasons. Due to a number of ongoing  
40 wars and, most recently, the conflict in Sudan, this number has eclipsed 110 million people for the  
41 first time (UNHCR, 2023b). Forcibly displaced people (FDP) are exposed to many stressors before,  
42 during, and after displacement (e.g., Drescher et al., 2021; Steel et al., 2009). Not surprisingly, FDP  
43 are at a high risk of developing mental disorders with estimates, for example, around 32% for post-  
44 traumatic stress (PTS) disorder (e.g., Blackmore et al., 2020; Patanè et al., 2022).

45 Due to the substantial personal suffering and the high economic costs of untreated mental  
46 health problems, it is crucial for hosting countries to provide adequate mental healthcare for FDP  
47 (Schick et al., 2016). Different treatment approaches have been taken to treat FDP including  
48 therapies delivered by specialists (e.g., cognitive behaviour therapy; CBT; Crumlish & O'Rourke,  
49 2010), low-intensity interventions delivered by non-specialists (e.g., Problem Management Plus;  
50 PM+; Sijbrandij et al., 2020), and (un)guided self-help programs (e.g., Step-by-Step; SbS; Cuijpers et  
51 al., 2022). The task-sharing approach of scalable psychological interventions delivered by non-  
52 specialists seems to be a viable solution for settings which are burdened by a scarcity of specialised  
53 mental health services in low- and middle-income countries (Barbui et al., 2020; van Ginneken et al.,  
54 2021) or where adequate mental healthcare is hindered by language barriers and limited access to  
55 facilities in high-income countries (Lange, 2021). While several meta-analyses have shown different  
56 psychological interventions to effectively reduce PTS, there is a considerable heterogeneity among  
57 studies (e.g., Kip et al., 2020) which may be attributed to differences in characteristics related to  
58 beneficiaries, providers, intervention, and study design. However, factors contributing to this  
59 heterogeneity have not yet been explored.

## STUDY PROTOCOL FOR AN IPD-MA ON FORCIBLY DISPLACED PEOPLE

5

1  
2  
3  
4 60 Despite overall efficacy of existing interventions, beneficiaries with a forced displacement  
5  
6 61 background compared to those without such a background benefit less from the same interventions  
7  
8 62 (ter Heide & Smid, 2015), while a large proportion of FDP (up to 60%; e.g., ter Heide et al., 2016) *do*  
9  
10 63 *not improve* following treatment, highlighting the necessity of further investigating factors  
11  
12 64 contributing to individual differences in treatment outcome. Yet, relatively little is known about  
13  
14 65 factors impacting individual differences in treatment trajectories of PTS in this population. The few  
15  
16 66 studies that have made an attempt to explore this matter (e.g., Haagen et al., 2017) have been often  
17  
18 67 limited by small sample sizes and thus lack the necessary statistical power to yield reliable findings.

19  
20  
21  
22 68 Therefore, to explore treatment effects and their moderators, the present study aims to  
23  
24 69 conduct an Individual Patient Data meta-analysis (IPD-MA), in which datasets from separate  
25  
26 70 randomised-controlled trials (RCT) will be synthesised. IPD-MAs are considered the *gold standard* of  
27  
28 71 statistical approaches when synthesising and analysing evidence from multiple studies (Broeze et al.,  
29  
30 72 2010). By merging different IPD datasets with each other, a much larger sample size is reached than  
31  
32 73 when looking at a single-study dataset, an advantage which allows for more complex analyses with  
33  
34 74 statistical power and precision large enough to detect significant moderators of treatment effects  
35  
36 75 and examine predictors of rare events such as adverse outcomes (Smith et al., 2011). In particular,  
37  
38 76 we aim to 1) investigate treatment effects and 2) identify beneficiary, provider, intervention, and  
39  
40 77 study characteristics that moderate treatment outcome with regard to PTS symptom reduction  
41  
42 78 among adult FDP receiving psychological and psychosocial interventions compared to controls in the  
43  
44 79 non-active treatment condition.

## 80 Methods and analysis

### 81 *Eligibility criteria*

82 We will include trials that *a*) used an RCT study design including *b*) adult ( $\geq 18$  years) FDP (i.e.,  
83 refugees, asylum seekers, or internally displaced persons, as defined by the UNHCR, 2022) receiving

**STUDY PROTOCOL FOR AN IPD-MA ON FORCIBLY DISPLACED PEOPLE**

6

1  
2  
3  
4 84 c) psychological and psychosocial interventions (e.g., specific interventions such as CBT, low-  
5  
6 85 intensity interventions such as PM+, or (un)guided self-help programs such as SbS) or d) a non-active  
7  
8 86 control condition such as no treatment, waiting list, psychoeducation, or (enhanced) care-as-usual,  
9  
10  
11 87 and which e) assess PTS symptoms as outcome. Trials which included only a subsample of individuals  
12  
13 88 with a forced-displacement background will be still included in this IPD-MA, if the target sample in  
14  
15 89 the dataset can be identified.

16  
17  
18 90 *Identification and selection of studies*

19  
20  
21 91 We will conduct a systematic literature search in the databases MEDLINE, PsycINFO, PTSDpubs,  
22  
23 92 Cochrane, and Embase using search terms related to the population (i.e., FDP), intervention (i.e.,  
24  
25 93 psychological and psychosocial interventions), mental health outcomes (i.e., general distress, PTS,  
26  
27 94 depression, or anxiety), and study design (i.e., RCT). The search terms were identified through  
28  
29 95 researchers and clinicians from the field; however, the target population was not consulted.  
30  
31  
32 96 Inclusion of studies will be restricted to the following languages: English, German, French, Spanish,  
33  
34 97 Portuguese, and Dutch. Additionally, we will search the bibliographies and citations of 29 reviews  
35  
36 98 and meta-analyses related to the topic. Their references, the detailed search syntax, and the full  
37  
38 99 search strings of each database can be seen here:  
39  
40  
41 100 [https://osf.io/cbw3q/?view\\_only=2c42dff3c25a440cbd5a833e29e35c0b](https://osf.io/cbw3q/?view_only=2c42dff3c25a440cbd5a833e29e35c0b). Before conducting any  
42  
43 101 analyses, we will add the citations and bibliographies of all included articles to the screening process.

44  
45  
46 102 First, titles and abstracts of retrieved records will be screened independently by two raters  
47  
48 103 to identify studies that potentially meet the inclusion criteria outlined above. Second, the full-texts  
49  
50 104 of these potentially eligible studies will be retrieved and independently assessed for eligibility by the  
51  
52 105 same raters. Any disagreement between raters will be resolved through discussion with a senior  
53  
54 106 rater where necessary.

55  
56  
57  
58 107 *Data collection, extraction, and preparation*



**STUDY PROTOCOL FOR AN IPD-MA ON FORCIBLY DISPLACED PEOPLE**

7

1  
2  
3  
4 108 Authors of relevant trials identified in the selection process will be contacted to request anonymised  
5  
6 109 data of their studies, i.e., IPD including, but not limited to, the following variables: beneficiaries'  
7  
8 110 sociodemographic (e.g., education), migratory (e.g., time spent in host country), and clinical  
9  
10 111 characteristics (e.g., trauma history) and providers' (e.g., degree of training), intervention (e.g.,  
11  
12 112 format), and study characteristics (e.g., study setting).

13  
14  
15  
16 113 After gathering all primary datasets of the eligible studies, data accuracy will be checked by  
17  
18 114 comparing the frequencies of sociodemographic and clinical variables, as well as their mean scores  
19  
20 115 and standard deviations of continuous scales. Inconsistencies (e.g., extreme values or discrepancies  
21  
22 116 between the reported values and the delivered data) will be discussed and clarified with the authors  
23  
24 117 of the primary trials. After confirming the accuracy of each dataset, we will first synchronise  
25  
26 118 variables of interest and then merge the data into one large IPD meta-analytic dataset. Finally, PTS  
27  
28 119 outcome measures will be standardised by converting them to z-scores for each trial separately if  
29  
30 120 multiple measures had been used for the same outcome (according to the procedure used by  
31  
32 121 Karyotaki et al., 2015).

**122 *Quality assessment***

33  
34  
35  
36  
37  
38  
39  
40 123 The quality of included studies will be checked by two independent raters using the Revised  
41  
42 124 Cochrane tool (RoB2.0) for assessing risk of bias in RCT (Sterne et al., 2019). This tool assesses  
43  
44 125 several domains including bias from the randomisation process, deviations from intended  
45  
46 126 interventions, and measurement of the outcome. Two bias categories, i.e., "bias from missing  
47  
48 127 outcome data" and "selection from the reported result", will not be assessed with the RoB tool.  
49  
50 128 Instead, multiple imputation will be used to account for missing outcome data. The bias category  
51  
52 129 "selection of the reported result" is not applicable for IPD-MA as we will have access to the full  
53  
54 130 datasets of all included studies. Each item will be evaluated regarding its risk resulting in a low or  
55  
56 131 high risk of bias judgement per domain. Authors will be contacted in case of unclear items.  
57  
58  
59  
60

## STUDY PROTOCOL FOR AN IPD-MA ON FORCIBLY DISPLACED PEOPLE

8

132 *Statistical analysis*

133 The primary outcome will be PTS symptoms assessed at post-intervention (PT) and follow-up (FU).

134 Secondary outcomes will include positive mental health outcomes (e.g., well-being),

135 psychopathology (e.g., depression), disability, functioning, and quality of life at PT and FU

136 assessments, as well as adverse outcomes, attendance, and drop-out.

137 The analyses will be conducted according to the intention-to-treat principle, i.e., all  
138 randomised participants will be included in the analyses with the exception of resettlement as  
139 rationale for exclusion. Multiple imputation will be conducted using 100 imputations through the  
140 mvn method in STATA software, StataCorp, as recommended by Graham, Olchowski, and Gilreath  
141 (2007). To estimate the missing values, complete baseline variables will be used (e.g., PTS symptom  
142 levels at baseline, age, gender, etc.). To assess the difference between imputed and complete values  
143 we will conduct a sensitivity analysis using complete cases only. For the primary analyses, we will use  
144 the one-stage approach with IPD. Additionally, to compare effects of both type of trials, i.e., those  
145 that provided IPD and those that did not, a conventional aggregate data meta-analysis using a two-  
146 stage approach will be conducted. This is particularly advisable when a large proportion of authors  
147 did not share their datasets (Riley et al., 2007; Stewart & Tierney, 2002). Results from both the one-  
148 and two-stage approach will be compared and discrepancies will be discussed (Burke et al., 2017).  
149 Variables will be included as moderators in the analyses if they are represented by at least three  
150 studies.

151 **One-stage approach: analysis of IPD (primary analyses).** To investigate treatment effects of  
152 psychological and psychosocial interventions, we will perform a multilevel mixed-effects linear  
153 regression model with intervention condition (treatment vs. control) as the independent variable  
154 whilst controlling for trial and severity of PTS symptoms at baseline. The severity of PTS symptoms at  
155 PT and FU will be used as the dependent variable. To identify moderators of treatment effects, we  
156 will add an interaction between each potential moderator and PTS outcome into the multilevel

## STUDY PROTOCOL FOR AN IPD-MA ON FORCIBLY DISPLACED PEOPLE

9

1  
2  
3  
4 157 mixed-effects linear regression model. This procedure will be repeated for all aforementioned  
5  
6 158 secondary outcome variables.

8  
9 159 **Two-stage approach: analysis of aggregate data (secondary analyses).** First, we will  
10  
11 160 calculate effect sizes for each trial separately and then compare them across studies by running  
12  
13 161 conventional aggregate data meta-analyses including both, trials providing IPD and studies providing  
14  
15 162 only meta-data, in order to examine potential discrepancies in results. Thus, we will run multivariate  
16  
17 163 meta-analyses with standardised mean differences using a random-effects model accounting for  
18  
19 164 differences in trials (Bartlett, 1937; Viechtbauer, 2010). In order to identify moderators of treatment  
20  
21 165 effects, we will run several multiple linear regression models, including intervention condition and all  
22  
23 166 potential moderators as independent variables and PTS symptom scores at PT and FU assessments  
24  
25 167 as dependent variables for each trial separately. Subsequently, we will run several multivariate  
26  
27 168 regression models with a random effect controlling for trial and standardised regression coefficients  
28  
29 169 as dependent variables for each moderator separately. This procedure will be repeated for all  
30  
31 170 secondary outcome variables mentioned above.

32  
33  
34  
35  
36 171 **Heterogeneity (two-stage approach).** To quantify variation among studies we will conduct  
37  
38 172 analyses of heterogeneity by using Cochran's  $Q$ , prediction intervals, and  $I^2$  statistic (Borenstein et  
39  
40 173 al., 2009; Ioannidis et al., 2007; Vo et al., 2021).  $I^2$  is a measure which quantifies the proportion of  
41  
42 174 observed heterogeneity representing the difference between effects sizes that are not due to  
43  
44 175 sampling error but to differences in, for example, the populations or measures that are studied. It  
45  
46 176 ranges from 0-100% including increments of 0%, 25%, 50%, and 75%, indicating no, low, moderate,  
47  
48 177 and high heterogeneity, respectively (Borenstein et al., 2009).

49  
50  
51  
52 178 **Publication bias.** We will assess publication bias by creating "funnel plots" for a visual  
53  
54 179 evaluation of asymmetry and applying the "trim and fill" method (Duval & Tweedie, 2000).  
55  
56 180 Additionally, we will conduct an Egger's regression test to check whether this asymmetry is  
57  
58 181 statistically significant (Egger, Smith, & Minder (1967)).

**STUDY PROTOCOL FOR AN IPD-MA ON FORCIBLY DISPLACED PEOPLE**

1

**182 Ethics and dissemination**

183 We issued a clarification of responsibility for which the local ethic committee of the canton of Zurich,  
184 Switzerland, confirmed that this IPD-MA does not require ethical approval (Req-2022-00496). Only  
185 anonymised datasets will be requested from authors. With signing our data transfer agreement,  
186 authors warrant that the provided data had been legally obtained and all necessary consents for the  
187 transfer to and use by a third party had been secured. The results will be published in international  
188 peer-reviewed journals.

**189 Discussion**

190 Considering the rapidly growing number of FDP worldwide and their increased risk of developing  
191 mental disorders, immediate response from host countries with adequate mental healthcare is  
192 crucial to avoid high individual and societal costs. Exploring factors related to beneficiary, provider,  
193 intervention, and study characteristics, that moderate treatment effects may help inform who  
194 benefits most from which interventions, who needs additional care, clarify whether existing  
195 treatments need further improvement, and may guide the focus of future research and public health  
196 initiatives. To our knowledge, this is the first IPD-MA investigating treatment effects and their  
197 moderators among FDP.

**198 Current status**

199 The literature search, as well as the screening of titles and abstracts and the full-text review have  
200 been partially conducted for this IPD-MA. The systematic literature search in the aforementioned  
201 databases had been carried out on 12<sup>th</sup> January 2022 and will be updated prior to conducting the  
202 analyses.

**203 Authors' contributions**

## STUDY PROTOCOL FOR AN IPD-MA ON FORCIBLY DISPLACED PEOPLE

1

204 All authors contributed to the design of the study. JK drafted the manuscript of this study protocol  
205 while AA, EK, PC, RR, NM, and MS were involved in revising the manuscript critically for intellectual  
206 content. All authors read and approved the final manuscript.

### 207 Funding

208 This work is supported by the EMDO foundation of the University of Zurich (grant number: 1115).

### 209 Competing interests

210 The authors declare no conflict of interests.

### 211 References

- 212 Barbui, C., Purgato, M., Abdulmalik, J., Acarturk, C., Eaton, J., Gastaldon, C., Gureje, O., Hanlon, C.,  
213 Jordans, M., Lund, C., Nosè, M., Ostuzzi, G., Papola, D., Tedeschi, F., Tol, W., Turrini, G., Patel,  
214 V., & Thornicroft, G. (2020). Efficacy of psychosocial interventions for mental health outcomes  
215 in low-income and middle-income countries: an umbrella review. *The Lancet Psychiatry*, 7(2),  
216 162–172. [https://doi.org/10.1016/S2215-0366\(19\)30511-5](https://doi.org/10.1016/S2215-0366(19)30511-5)
- 217 Bartlett, M. S. (1937). *Properties of Sufficiency and Statistical Tests*. 113–126.  
218 [https://doi.org/10.1007/978-1-4612-0919-5\\_8](https://doi.org/10.1007/978-1-4612-0919-5_8)
- 219 Blackmore, R., Gray, K. M., Boyle, J. A., Fazel, M., Ranasinha, S., Fitzgerald, G., Misso, M., & Gibson-  
220 Helm, M. (2020). Systematic review and meta-analysis: The prevalence of mental illness in child  
221 and adolescent refugees and asylum seekers. *Journal of the American Academy of Child &*  
222 *Adolescent Psychiatry*, 59(6), 705–714. <https://doi.org/10.1016/j.jaac.2019.11.011>
- 223 Borenstein, M., Hedges, L., & Rothstein, H. (2009). Introduction to meta-analysis. In *John Wiley &*  
224 *Sons, Chichester* (Vol. 16, Issue 5). [https://doi.org/10.1016/S1134-2072\(09\)71285-X](https://doi.org/10.1016/S1134-2072(09)71285-X)
- 225 Broeze, K. A., Opmeer, B. C., van der Veen, F., Bossuyt, P. M., Bhattacharya, S., & Mol, B. W. J.  
226 (2010). Individual patient data meta-analysis: A promising approach for evidence synthesis in

## STUDY PROTOCOL FOR AN IPD-MA ON FORCIBLY DISPLACED PEOPLE

1.

- 227 reproductive medicine. *Human Reproduction Update*, 16(6), 561–567.
- 228 <https://doi.org/10.1093/humupd/dmq043>
- 229 Burke, D. L., Ensor, J., & Riley, R. D. (2017). Meta-analysis using individual participant data: one-stage  
230 and two-stage approaches, and why they may differ. *Statistics in Medicine*, 36(5), 855–875.  
231 <https://doi.org/10.1002/sim.7141>
- 232 Crumlish, N., & O'Rourke, K. (2010). A systematic review of treatments for post-traumatic stress  
233 disorder among refugees and asylum-seekers. *Journal of Nervous and Mental Disease*, 198(4),  
234 237–251. <https://doi.org/10.1097/NMD.0b013e3181d61258>
- 235 Cuijpers, P., Heim, E., Ramia, J. A., Burchert, S., Carswell, K., Cornelisz, I., Knaevelsrud, C., Noun, P.,  
236 van Klaveren, C., van't Hof, E., Zoghbi, E., van Ommeren, M., & Chammay, R. El. (2022). Effects  
237 of a WHO-guided digital health intervention for depression in Syrian refugees in Lebanon: a  
238 randomized controlled trial. *PLoS Medicine*, 19(6), 1–15.  
239 <https://doi.org/10.1371/journal.pmed.1004025>
- 240 Drescher, A., Kiselev, N., Akhtar, A., Acarturk, C., Bryant, R. A., Ilkkursun, Z., von Känel, R., Miller, K.  
241 E., Pfaltz, M. C., Schick, M., Schnyder, U., Sijbrandij, M., Spaaij, J., & Morina, N. (2021).  
242 Problems after flight: understanding and comparing Syrians' perspectives in the Middle East  
243 and Europe. *BMC Public Health*, 21(1), 717. <https://doi.org/10.1186/s12889-021-10498-1>
- 244 Duval, S., & Tweedie, R. (2000). A nonparametric “trim and fill” method of accounting for publication  
245 bias in meta-analysis. *Journal of the American Statistical Association*, 95(449), 89–98.  
246 <https://doi.org/10.1080/01621459.2000.10473905>
- 247 Egger, M., Smith, G. D., & Minder, C. (1967). Bias in meta-analysis detected by a simple, graphical  
248 test. *Angewandte Chemie International Edition*, 6(11), 951–952.
- 249 Graham, J. W., Olchowski, A. E., & Gilreath, T. D. (2007). How many imputations are really needed?

## STUDY PROTOCOL FOR AN IPD-MA ON FORCIBLY DISPLACED PEOPLE

1

- 1  
2  
3  
4 250 Some practical clarifications of multiple imputation theory. *Prevention Science*, 8(3), 206–213.  
5  
6 251 <https://doi.org/10.1007/s11121-007-0070-9>  
7  
8  
9 252 Haagen, J. F. G., ter Heide, F. J. J., Mooren, T. M., Knipscheer, J. W., & Kleber, R. J. (2017). Predicting  
10  
11 253 post-traumatic stress disorder treatment response in refugees: Multilevel analysis. *British*  
12  
13 254 *Journal of Clinical Psychology*, 56(1), 69–83. <https://doi.org/10.1111/bjc.12121>  
14  
15  
16 255 Ioannidis, J. P. A., Patsopoulos, N. A., & Evangelou, E. (2007). Uncertainty in heterogeneity estimates  
17  
18 256 in meta-analyses. *British Medical Journal*, 335(7626), 914–916.  
19  
20 257 <https://doi.org/10.1136/bmj.39343.408449.80>  
21  
22  
23  
24 258 Karyotaki, E., Kleiboer, A., Smit, F., Turner, D. T., Pastor, A. M., Andersson, G., Berger, T., Botella, C.,  
25  
26 259 Breton, J. M., Carlbring, P., Christensen, H., De Graaf, E., Griffiths, K., Donker, T., Farrer, L.,  
27  
28 260 Huibers, M. J. H., Lenndin, J., Mackinnon, A., Meyer, B., ... Cuijpers, P. (2015). Predictors of  
29  
30 261 treatment dropout in self-guided web-based interventions for depression: an “individual  
31  
32 262 patient data” meta-analysis. *Psychological Medicine*, 45(13), 2717–2726.  
33  
34 263 <https://doi.org/10.1017/S0033291715000665>  
35  
36  
37  
38 264 Kip, A., Priebe, S., Holling, H., & Morina, N. (2020). Psychological interventions for posttraumatic  
39  
40 265 stress disorder and depression in refugees: A meta-analysis of randomized controlled trials.  
41  
42 266 *Clinical Psychology & Psychotherapy*, 27(4), 489–503. <https://doi.org/10.1002/cpp.2446>  
43  
44  
45 267 Lange, K. W. (2021). Task sharing in psychotherapy as a viable global mental health approach in  
46  
47 268 resource-poor countries and also in high-resource settings. *Global Health Journal*, 5(3), 120–  
48  
49 269 127. <https://doi.org/10.1016/j.glohj.2021.07.001>  
50  
51  
52  
53 270 Patanè, M., Ghane, S., Karyotaki, E., Cuijpers, P., Schoonmade, L., Tarsitani, L., & Sijbrandij, M.  
54  
55 271 (2022). Prevalence of mental disorders in refugees and asylum seekers: a systematic review  
56  
57 272 and meta-analysis. *Global Mental Health*, 9, 250–263. <https://doi.org/10.1017/gmh.2022.29>  
58  
59  
60

## STUDY PROTOCOL FOR AN IPD-MA ON FORCIBLY DISPLACED PEOPLE

1.

- 1  
2  
3  
4 273 Riley, R. D., Simmonds, M. C., & Look, M. P. (2007). Evidence synthesis combining individual patient  
5  
6 274 data and aggregate data: a systematic review identified current practice and possible methods.  
7  
8 275 *Journal of Clinical Epidemiology*, 60(5), 431.e1-431.e12.  
9  
10 276 <https://doi.org/10.1016/j.jclinepi.2006.09.009>
- 11  
12  
13  
14 277 Schick, M., Zumwald, A., Knöpfli, B., Nickerson, A., Bryant, R. A., Schnyder, U., Müller, J., & Morina,  
15  
16 278 N. (2016). Challenging future, challenging past: the relationship of social integration and  
17  
18 279 psychological impairment in traumatized refugees. *European Journal of Psychotraumatology*, 7,  
19  
20 280 28057. <https://doi.org/10.3402/ejpt.v7.28057>
- 21  
22  
23 281 Sijbrandij, M., de Graaff, A., Cuijpers, P., & Kieft, B. (2020). Problem Management Plus (PM+) for  
24  
25 282 Syrian refugees in the Netherlands. *European Journal of Public Health*, 30, 233–234.  
26  
27 283 <https://doi.org/10.1093/eurpub/ckaa165.629>
- 28  
29  
30 284 Smith, C. T., Oyee, J., Marcucci, M., Rovers, M., Iorio, A., Riley, R., Williamson, P., & Clarke, M. (2011).  
31  
32 285 Individual participant data meta-analyses compared with meta-analyses based on aggregate  
33  
34 286 data. *Trials*, 12(S1), 1–2. <https://doi.org/10.1186/1745-6215-12-s1-a57>
- 35  
36  
37 287 Steel, Z., Chey, T., Silove, D., Marnane, C., Bryant, R. A., & van Ommeren, M. (2009). Association of  
38  
39 288 torture and other potentially traumatic events with mental health outcomes among  
40  
41 289 populations exposed to mass conflict and displacement: A systematic review and meta-  
42  
43 290 analysis. *JAMA: Journal of the American Medical Association*, 302(5), 537–549.  
44  
45 291 <https://doi.org/10.1001/jama.2009.1132>
- 46  
47  
48  
49 292 Sterne, J. A. C., Savović, J., Page, M. J., Elbers, R. G., Blencowe, N. S., Boutron, I., Cates, C. J., Cheng,  
50  
51 293 H. Y., Corbett, M. S., Eldridge, S. M., Emberson, J. R., Hernán, M. A., Hopewell, S., Hróbjartsson,  
52  
53 294 A., Junqueira, D. R., Jüni, P., Kirkham, J. J., Lasserson, T., Li, T., ... Higgins, J. P. T. (2019). RoB 2: A  
54  
55 295 revised tool for assessing risk of bias in randomised trials. *The BMJ*, 366, 1–8.  
56  
57 296 <https://doi.org/10.1136/bmj.l4898>
- 58  
59  
60



## STUDY PROTOCOL FOR AN IPD-MA ON FORCIBLY DISPLACED PEOPLE

1.

- 1  
2  
3  
4 297 Stewart, L. A., & Tierney, J. F. (2002). To IPD or not to IPD? Advantages and disadvantages of  
5  
6 298 systematic reviews using individual patient data. *Evaluation & the Health Professions*, 25(1),  
7  
8 299 76–97. <https://doi.org/10.1177/0163278702025001006>
- 10  
11 300 ter Heide, F. J. J., Mooren, T. M., van de Schoot, R., de Jongh, A., & Kleber, R. J. (2016). Eye  
12  
13 301 movement desensitisation and reprocessing therapy v. stabilisation as usual for refugees:  
14  
15 302 randomised controlled trial. *The British Journal of Psychiatry : The Journal of Mental Science*,  
16  
17 303 209(4), 311–318. <https://doi.org/10.1192/bjp.bp.115.167775>
- 20  
21 304 ter Heide, F. J. J., & Smid, G. E. (2015). Difficult to treat? a comparison of the effectiveness of  
22  
23 305 treatment as usual in refugees and non-refugees. *BJPsych Bulletin*, 39(4), 182–186.  
24  
25 306 <https://doi.org/10.1192/pb.bp.114.047928>
- 28  
29 307 van Ginneken, N., Chin, W. Y., Lim, Y. C., Ussif, A., Singh, R., Shahmalak, U., Purgato, M., Rojas-García,  
30  
31 308 A., Uphoff, E., McMullen, S., Foss, H. S., Thapa Pachya, A., Rashidian, L., Borghesani, A.,  
32  
33 309 Henschke, N., Chong, L. Y., & Lewin, S. (2021). Primary-level worker interventions for the care  
34  
35 310 of people living with mental disorders and distress in low- and middle-income countries.  
36  
37 311 *Cochrane Database of Systematic Reviews*, 2021(8).  
38  
39 312 <https://doi.org/10.1002/14651858.CD009149.pub3>
- 42  
43 313 Viechtbauer, W. (2010). Conducting meta-analyses in R with the metafor. *Journal of Statistical*  
44  
45 314 *Software*, 36(3), 1–48.
- 47  
48 315 Vo, T.-T., Porcher, R., & Vansteelandt, S. (2021). Assessing the impact of case-mix heterogeneity in  
49  
50 316 individual participant data meta-analysis: Novel use of I<sup>2</sup> statistic and prediction interval.  
51  
52 317 *Research Methods in Medicine & Health Sciences*, 2(1), 12–30.  
53  
54 318 <https://doi.org/10.1177/2632084320957207>
- 57  
58 319 United Nations High Commissioner for Refugees. (2023a, June 14). Figures at a glance.

## STUDY PROTOCOL FOR AN IPD-MA ON FORCIBLY DISPLACED PEOPLE

1

1  
2  
3  
4 320 <https://www.unhcr.org/figures-at-a-glance.html>

5  
6  
7 321 United Nations High Commissioner for Refugees. (2023b, June 14). UNHCR calls for concerted action

8  
9  
10 322 as forced displacement hits new record in 2022.

11  
12  
13 323 <https://www.unhcr.org/news/press-releases/unhcr-calls-concerted-action-forced->

14  
15 324 [displacement-hits-new-record-2022](https://www.unhcr.org/news/press-releases/unhcr-calls-concerted-action-forced-displacement-hits-new-record-2022)

16  
17  
18 325 United Nations High Commissioner for Refugees. (2022, October 27). What is the difference

19  
20  
21 326 between population statistics for forcibly displaced and the population that UNHCR is

22  
23 327 mandated to protect and/or assist? <https://www.unhcr.org/refugee->

24  
25 328 [statistics/insights/explainers/forcibly-displaced-pocs.html](https://www.unhcr.org/refugee-statistics/insights/explainers/forcibly-displaced-pocs.html)

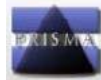

## PRISMA 2020 Checklist

| Section and Topic             | Item # | Checklist item                                                                                                                                                                                                                                                                                       | Location where item is reported |
|-------------------------------|--------|------------------------------------------------------------------------------------------------------------------------------------------------------------------------------------------------------------------------------------------------------------------------------------------------------|---------------------------------|
| <b>TITLE</b>                  |        |                                                                                                                                                                                                                                                                                                      |                                 |
| Title                         | 1      | Identify the report as a systematic review.                                                                                                                                                                                                                                                          | p. 1                            |
| <b>ABSTRACT</b>               |        |                                                                                                                                                                                                                                                                                                      |                                 |
| Abstract                      | 2      | See the PRISMA 2020 for Abstracts checklist.                                                                                                                                                                                                                                                         | p. 2                            |
| <b>INTRODUCTION</b>           |        |                                                                                                                                                                                                                                                                                                      |                                 |
| Rationale                     | 3      | Describe the rationale for the review in the context of existing knowledge.                                                                                                                                                                                                                          | p. 4-5                          |
| Objectives                    | 4      | Provide an explicit statement of the objective(s) or question(s) the review addresses.                                                                                                                                                                                                               | p. 5                            |
| <b>METHODS</b>                |        |                                                                                                                                                                                                                                                                                                      |                                 |
| Eligibility criteria          | 5      | Specify the inclusion and exclusion criteria for the review and how studies were grouped for the syntheses.                                                                                                                                                                                          | p. 5-6                          |
| Information sources           | 6      | Specify all databases, registers, websites, organisations, reference lists and other sources searched or consulted to identify studies. Specify the date when each source was last searched or consulted.                                                                                            | p. 6                            |
| Search strategy               | 7      | Present the full search strategies for all databases, registers and websites, including any filters and limits used.                                                                                                                                                                                 | p. 6                            |
| Selection process             | 8      | Specify the methods used to decide whether a study met the inclusion criteria of the review, including how many reviewers screened each record and each report retrieved, whether they worked independently, and if applicable, details of automation tools used in the process.                     | p. 6                            |
| Data collection process       | 9      | Specify the methods used to collect data from reports, including how many reviewers collected data from each report, whether they worked independently, any processes for obtaining or confirming data from study investigators, and if applicable, details of automation tools used in the process. | p. 7                            |
| Data items                    | 10a    | List and define all outcomes for which data were sought. Specify whether all results that were compatible with each outcome domain in each study were sought (e.g. for all measures, time points, analyses), and if not, the methods used to decide which results to collect.                        | p. 7                            |
|                               | 10b    | List and define all other variables for which data were sought (e.g. participant and intervention characteristics, funding sources). Describe any assumptions made about any missing or unclear information.                                                                                         | p. 7                            |
| Study risk of bias assessment | 11     | Specify the methods used to assess risk of bias in the included studies, including details of the tool(s) used, how many reviewers assessed each study and whether they worked independently, and if applicable, details of automation tools used in the process.                                    | p. 7                            |
| Effect measures               | 12     | Specify for each outcome the effect measure(s) (e.g. risk ratio, mean difference) used in the synthesis or presentation of results.                                                                                                                                                                  | p. 8-9                          |
| Synthesis methods             | 13a    | Describe the processes used to decide which studies were eligible for each synthesis (e.g. tabulating the study intervention characteristics and comparing against the planned groups for each synthesis (item #5)).                                                                                 | p. 6-7                          |
|                               | 13b    | Describe any methods required to prepare the data for presentation or synthesis, such as handling of missing summary statistics, or data conversions.                                                                                                                                                | p. 7-8                          |
|                               | 13c    | Describe any methods used to tabulate or visually display results of individual studies and syntheses.                                                                                                                                                                                               | p. 9                            |
|                               | 13d    | Describe any methods used to synthesize results and provide a rationale for the choice(s). If meta-analysis was performed, describe the model(s), method(s) to identify the presence and extent of statistical heterogeneity, and software package(s) used.                                          | p. 8-9                          |
|                               | 13e    | Describe any methods used to explore possible causes of heterogeneity among study results (e.g. subgroup analysis, meta-regression).                                                                                                                                                                 | p. 8-9                          |
|                               | 13f    | Describe any sensitivity analyses conducted to assess robustness of the synthesized results.                                                                                                                                                                                                         | p. 8-9                          |
| Reporting bias assessment     | 14     | Describe any methods used to assess risk of bias due to missing results in a synthesis (arising from reporting biases).                                                                                                                                                                              | p. 7                            |
| Certainty assessment          | 15     | Describe any methods used to assess certainty (or confidence) in the body of evidence for an outcome.                                                                                                                                                                                                | p. 9                            |

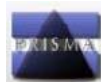

## PRISMA 2020 Checklist

1  
2  
3  
4  
5  
6  
7  
8  
9  
10  
11  
12  
13  
14  
15  
16  
17  
18  
19  
20  
21  
22  
23  
24  
25  
26  
27  
28  
29  
30  
31  
32  
33  
34  
35  
36  
37  
38  
39  
40  
41  
42  
43  
44  
45  
46  
47

| Section and Topic                              | Item # | Checklist item                                                                                                                                                                                                                                                                       | Location where item is reported |
|------------------------------------------------|--------|--------------------------------------------------------------------------------------------------------------------------------------------------------------------------------------------------------------------------------------------------------------------------------------|---------------------------------|
| <b>RESULTS</b>                                 |        |                                                                                                                                                                                                                                                                                      |                                 |
| Study selection                                | 16a    | Describe the results of the search and selection process, from the number of records identified in the search to the number of studies included in the review, ideally using a flow diagram.                                                                                         | NA                              |
|                                                | 16b    | Cite studies that might appear to meet the inclusion criteria, but which were excluded, and explain why they were excluded.                                                                                                                                                          | NA                              |
| Study characteristics                          | 17     | Cite each included study and present its characteristics.                                                                                                                                                                                                                            | NA                              |
| Risk of bias in studies                        | 18     | Present assessments of risk of bias for each included study.                                                                                                                                                                                                                         | NA                              |
| Results of individual studies                  | 19     | For all outcomes, present, for each study: (a) summary statistics for each group (where appropriate) and (b) an effect estimate and its precision (e.g. confidence/credible interval), ideally using structured tables or plots.                                                     | NA                              |
| Results of syntheses                           | 20a    | For each synthesis, briefly summarise the characteristics and risk of bias among contributing studies.                                                                                                                                                                               | NA                              |
|                                                | 20b    | Present results of all statistical syntheses conducted. If meta-analysis was done, present for each the summary estimate and its precision (e.g. confidence/credible interval) and measures of statistical heterogeneity. If comparing groups, describe the direction of the effect. | NA                              |
|                                                | 20c    | Present results of all investigations of possible causes of heterogeneity among study results.                                                                                                                                                                                       | NA                              |
|                                                | 20d    | Present results of all sensitivity analyses conducted to assess the robustness of the synthesized results.                                                                                                                                                                           | NA                              |
| Reporting biases                               | 21     | Present assessments of risk of bias due to missing results (arising from reporting biases) for each synthesis assessed.                                                                                                                                                              | NA                              |
| Certainty of evidence                          | 22     | Present assessments of certainty (or confidence) in the body of evidence for each outcome assessed.                                                                                                                                                                                  | NA                              |
| <b>DISCUSSION</b>                              |        |                                                                                                                                                                                                                                                                                      |                                 |
| Discussion                                     | 23a    | Provide a general interpretation of the results in the context of other evidence.                                                                                                                                                                                                    | NA                              |
|                                                | 23b    | Discuss any limitations of the evidence included in the review.                                                                                                                                                                                                                      | NA                              |
|                                                | 23c    | Discuss any limitations of the review processes used.                                                                                                                                                                                                                                | NA                              |
|                                                | 23d    | Discuss implications of the results for practice, policy, and future research.                                                                                                                                                                                                       | NA                              |
| <b>OTHER INFORMATION</b>                       |        |                                                                                                                                                                                                                                                                                      |                                 |
| Registration and protocol                      | 24a    | Provide registration information for the review, including register name and registration number, or state that the review was not registered.                                                                                                                                       | p. 2                            |
|                                                | 24b    | Indicate where the review protocol can be accessed, or state that a protocol was not prepared.                                                                                                                                                                                       |                                 |
|                                                | 24c    | Describe and explain any amendments to information provided at registration or in the protocol.                                                                                                                                                                                      |                                 |
| Support                                        | 25     | Describe sources of financial or non-financial support for the review, and the role of the funders or sponsors in the review.                                                                                                                                                        |                                 |
| Competing interests                            | 26     | Declare any competing interests of review authors.                                                                                                                                                                                                                                   |                                 |
| Availability of data, code and other materials | 27     | Report which of the following are publicly available and where they can be found: template data collection forms; data extracted from included studies; data used for all analyses; analytic code; any other materials used in the review.                                           |                                 |

From: Page MJ, McKenzie JE, Bossuyt PM, Boutron I, Hoffmann TC, Mulrow CD, et al. The PRISMA 2020 statement: an updated guideline for reporting systematic reviews. *BMJ* 2021;372:n71. doi: 10.1136/bmj.n71

For peer review only - <http://bmjopen.bmj.com/site/about/guidelines.xhtml>  
For more information, visit: <http://www.prisma-statement.org/>

# BMJ Open

## What works for whom and why? Treatment effects and their moderators among forcibly displaced people receiving psychological and psychosocial interventions: study protocol for an individual patient data meta-analysis

|                                 |                                                                                                                                                                                                                                                                                                                                                                                                                                                                                                                                                                                                                                                                                                                                                                                                                                                                                                                                                                                                                                                                                                                                                                                                                                                                                                                                                                                                                                                                                                    |
|---------------------------------|----------------------------------------------------------------------------------------------------------------------------------------------------------------------------------------------------------------------------------------------------------------------------------------------------------------------------------------------------------------------------------------------------------------------------------------------------------------------------------------------------------------------------------------------------------------------------------------------------------------------------------------------------------------------------------------------------------------------------------------------------------------------------------------------------------------------------------------------------------------------------------------------------------------------------------------------------------------------------------------------------------------------------------------------------------------------------------------------------------------------------------------------------------------------------------------------------------------------------------------------------------------------------------------------------------------------------------------------------------------------------------------------------------------------------------------------------------------------------------------------------|
| Journal:                        | <i>BMJ Open</i>                                                                                                                                                                                                                                                                                                                                                                                                                                                                                                                                                                                                                                                                                                                                                                                                                                                                                                                                                                                                                                                                                                                                                                                                                                                                                                                                                                                                                                                                                    |
| Manuscript ID                   | bmjopen-2023-078473.R1                                                                                                                                                                                                                                                                                                                                                                                                                                                                                                                                                                                                                                                                                                                                                                                                                                                                                                                                                                                                                                                                                                                                                                                                                                                                                                                                                                                                                                                                             |
| Article Type:                   | Protocol                                                                                                                                                                                                                                                                                                                                                                                                                                                                                                                                                                                                                                                                                                                                                                                                                                                                                                                                                                                                                                                                                                                                                                                                                                                                                                                                                                                                                                                                                           |
| Date Submitted by the Author:   | 29-Dec-2023                                                                                                                                                                                                                                                                                                                                                                                                                                                                                                                                                                                                                                                                                                                                                                                                                                                                                                                                                                                                                                                                                                                                                                                                                                                                                                                                                                                                                                                                                        |
| Complete List of Authors:       | <p>Kurath, Jennifer; University of Zurich, Department of Consultation-Liaison Psychiatry and Psychosomatic Medicine, University Hospital Zurich; University of Zurich, Faculty of Medicine</p> <p>Akhtar, Aemal; Karolinska Institute, Division of Insurance Medicine, Department of Clinical Neuroscience; University of New South Wales, School of Psychology</p> <p>Karyotaki, Eirini ; Vrije Universiteit Amsterdam, Department of Clinical, Neuro- and Developmental Psychology, WHO Collaborating Center for Research and Dissemination of Psychological Interventions, Amsterdam Public Health Institute</p> <p>Sijbrandij, Marit; Vrije Universiteit Amsterdam, Department of Clinical, Neuro- and Developmental Psychology, WHO Collaborating Center for Research and Dissemination of Psychological Interventions, Amsterdam Public Health Institute</p> <p>Cuijpers, Pim; Vrije Universiteit Amsterdam, Department of Clinical, Neuro- and Developmental Psychology, WHO Collaborating Center for Research and Dissemination of Psychological Interventions, Amsterdam Public Health Institute</p> <p>Bryant, Richard ; University of New South Wales, School of Psychology</p> <p>Morina, Naser; University of Zurich, Department of Consultation-Liaison Psychiatry and Psychosomatic Medicine, University Hospital Zurich</p> <p>Department of Consultation-Liaison Psychiatry and Psychosomatic Medicine, University Hospital Zurich; University of Zurich, Faculty of Medicine</p> |
| <b>Primary Subject Heading</b>: | Mental health                                                                                                                                                                                                                                                                                                                                                                                                                                                                                                                                                                                                                                                                                                                                                                                                                                                                                                                                                                                                                                                                                                                                                                                                                                                                                                                                                                                                                                                                                      |
| Secondary Subject Heading:      | Patient-centred medicine                                                                                                                                                                                                                                                                                                                                                                                                                                                                                                                                                                                                                                                                                                                                                                                                                                                                                                                                                                                                                                                                                                                                                                                                                                                                                                                                                                                                                                                                           |
| Keywords:                       | Health Equity, Patients, PSYCHIATRY, Psychometrics, Quality of Life, Randomized Controlled Trial                                                                                                                                                                                                                                                                                                                                                                                                                                                                                                                                                                                                                                                                                                                                                                                                                                                                                                                                                                                                                                                                                                                                                                                                                                                                                                                                                                                                   |
|                                 |                                                                                                                                                                                                                                                                                                                                                                                                                                                                                                                                                                                                                                                                                                                                                                                                                                                                                                                                                                                                                                                                                                                                                                                                                                                                                                                                                                                                                                                                                                    |

1  
2  
3  
4  
5  
6  
7  
8  
9  
10  
11  
12  
13  
14  
15  
16  
17  
18  
19  
20  
21  
22  
23  
24  
25  
26  
27  
28  
29  
30  
31  
32  
33  
34  
35  
36  
37  
38  
39  
40  
41  
42  
43  
44  
45  
46  
47  
48  
49  
50  
51  
52  
53  
54  
55  
56  
57  
58  
59  
60

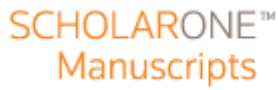

1  
2  
3 **What works for whom and why? Treatment effects and their moderators among forcibly displaced**  
4 **people receiving psychological and psychosocial interventions: study protocol for an individual**  
5 **patient data meta-analysis**  
6  
7  
8  
9

10  
11  
12  
13 Jennifer Kurath<sup>1,2</sup> (jennifer.kurath@usz.ch), Aemal Akhtar<sup>3,4</sup> (aemal.akhtar@ki.se), Eirini Karyotaki<sup>5</sup>  
14 (e.karyotaki@vu.nl), Marit Sijbrandij<sup>5</sup> (e.m.sijbrandij@vu.nl), Pim Cuijpers<sup>5</sup> (p.cuijpers@vu.nl),  
15  
16 Richard Bryant<sup>4</sup> (r.bryant@unsw.edu.au), Naser Morina<sup>1,2</sup> (naser.morina@usz.ch)  
17  
18  
19  
20  
21  
22

23  
24 <sup>1</sup> Department of Consultation-Liaison Psychiatry and Psychosomatic Medicine, University Hospital  
25 Zurich, University of Zurich, Zurich, Switzerland  
26  
27

28  
29 <sup>2</sup> Faculty of Medicine, University of Zurich, Zurich, Switzerland  
30

31  
32 <sup>3</sup> Division of Insurance Medicine, Department of Clinical Neuroscience, Karolinska Institute,  
33 Stockholm, Sweden  
34  
35

36  
37 <sup>4</sup> School of Psychology, University of New South Wales, Sydney, Australia  
38  
39

40  
41 <sup>5</sup> Department of Clinical, Neuro- and Developmental Psychology, WHO Collaborating Center for  
42 Research and Dissemination of Psychological Interventions, Amsterdam Public Health Institute, Vrije  
43 Universiteit Amsterdam, Amsterdam, the Netherlands  
44  
45  
46  
47  
48  
49

50 Correspondence to:

51  
52 Jennifer Kurath, M.Sc.

53  
54 Haldenbachstrasse 18, 8091 Zurich, Switzerland  
55  
56  
57  
58  
59  
60

1  
2  
3 1 Abstract  
4  
5

6 2 **Introduction:** Forcibly displaced people (FDP) have a high risk of developing mental disorders such as  
7  
8 3 post-traumatic stress (PTS) disorder. Providing adequate mental healthcare for FDP is crucial but  
9  
10 4 despite overall efficacy of many existing interventions, a large proportion of FDP does not benefit  
11  
12 5 from treatment, highlighting the necessity of further investigating factors contributing to individual  
13  
14 6 differences in treatment outcome. Yet, the few studies that have explored moderators of treatment  
15  
16 7 effects are often insufficiently powered. Therefore, the present Individual Patient Data meta-analysis  
17  
18 8 (IPD-MA) will investigate treatment effects and their moderators - variables related to beneficiaries,  
19  
20 9 providers, intervention, and study characteristics in relation to PTS outcomes.  
21  
22  
23

24 10 **Methods and analysis:** A systematic literature search will be conducted from database inception in  
25  
26 11 the databases PsycINFO, Cochrane, Embase, PTSDpubs, and Web of Science. Only studies published  
27  
28 12 in English, German, French, Spanish, Portuguese, and Dutch will be considered. Retrieved records  
29  
30 13 will be screened for eligibility. Randomised controlled trials on adult FDP receiving psychological and  
31  
32 14 psychosocial interventions aimed at alleviating symptoms such as PTS compared to a control  
33  
34 15 condition without intervention will be included in this IPD-MA. Subsequently, authors of eligible  
35  
36 16 studies will be contacted to request individual patient data (IPD). All datasets obtained will be  
37  
38 17 synthesised into one large dataset which will be analysed using a one-stage approach by conducting  
39  
40 18 mixed-effect linear regression models (i.e., primary analysis). Additionally, an aggregate data meta-  
41  
42 19 analysis using a two-stage approach by conducting a multivariate regression model including all IPD  
43  
44 20 (transformed) and available meta-data from study reports (i.e., secondary analysis). PTS will serve as  
45  
46 21 primary outcome measure, while mental health outcomes other than PTS, attendance, attrition,  
47  
48 22 treatment non-response, and adverse outcomes will be examined as secondary outcomes.  
49  
50  
51  
52  
53

54 23 **Ethics and dissemination:** This IPD-MA does not require ethical approval. The results will be  
55  
56 24 published in international peer-reviewed journals.  
57  
58

59 25 **Study registration:** PROSPERO, CRD42022299510.  
60



1  
2  
3 26 **Strengths and limitations of this study**  
4  
5

- 6 27 • This individual data patient meta-analysis (IPD-MA), compared to traditional meta-analyses,  
7  
8 28 will allow more complex analyses to identify moderators of treatment effects at patient-  
9  
10 29 level while the standardisation of variables is facilitated, and missing values can be  
11  
12 30 accounted for.  
13  
14  
15 31 • By merging different datasets into one large dataset, this IPD-MA has the potential to  
16  
17 32 investigate predictors of rare events such as adverse outcomes.  
18  
19 33 • This study can contribute important information towards identifying factors that affect  
20  
21 34 treatment outcome, response, attendance, attrition, and adverse effects.  
22  
23  
24 35 • IPD meta-analysis is limited by the availability of IPD and their quality.  
25  
26  
27 36

## 37 INTRODUCTION

38 According to the United Nations High Commissioner for Refugees [1], an unprecedented 108.4  
39 million people worldwide have been forced to flee their homes at the end of 2022 as a result of  
40 persecution, conflict, violence, and other reasons. Due to a number of ongoing wars and, most  
41 recently, the conflict in Sudan, this number has eclipsed 110 million people for the first time [2].  
42 Forcibly displaced people (FDP) are exposed to many stressors before, during, and after  
43 displacement [3-4]. Not surprisingly, FDP are at a high risk of developing mental disorders with  
44 estimates, for example, around 32% for post-traumatic stress (PTS) disorder [5-6].

45 Due to the substantial personal suffering and the high economic costs of untreated mental  
46 health problems, it is crucial for hosting countries to provide adequate mental healthcare for FDP  
47 [7]. Different treatment approaches have been taken to treat FDP including therapies delivered by  
48 specialists (e.g., cognitive behaviour therapy; CBT; [8]), low-intensity interventions delivered by non-  
49 specialists (e.g., Problem Management Plus; PM+; [9]), and guided (e.g., Step-by-Step; SbS; [10]) or  
50 unguided self-help programs. The task-sharing approach of scalable psychological interventions  
51 delivered by non-specialists seems to be a viable solution for settings which are burdened by a  
52 scarcity of specialised mental health services in low- and middle-income countries [11] or where  
53 adequate mental healthcare is hindered by language barriers and limited access to facilities in high-  
54 income countries [12]. While several meta-analyses have shown different psychological  
55 interventions to effectively reduce PTS, there is a considerable heterogeneity among studies [13-14],  
56 some of which have been investigated and attributed to differences in study characteristics. For  
57 example, [15] found that treatment effects of narrative exposure therapy increase if the providers  
58 themselves have a displacement background. While randomised-controlled trials (RCT) and trials  
59 with an active control group seem to be associated with smaller treatment effects [16-17], findings  
60 with regard to treatment dose (i.e., number of sessions) tend to be mixed, with evidence for more  
61 sessions boosting the treatment effect [16-17] or having no impact [13]. However, many tested

1  
2  
3 62 moderators did not seem to influence treatment effects across studies including medication rate,  
4  
5 63 time since displacement [13], residence status [18], use of interpreter [16], type of PTS assessment  
6  
7 64 [16-17], study quality, country where trial was conducted, or ethnicity [17].  
8  
9

10 65 Despite many existing interventions showing overall efficacy, beneficiaries with a forced  
11  
12 66 displacement background compared to those without such a background benefit less from the same  
13  
14 67 interventions [19], while a large proportion of FDP (up to 60%; e.g., [20]) *do not improve* following  
15  
16 68 treatment. A recent Individual Patient Data meta-analysis (IPD-MA) combining data from several  
17  
18 69 PM+ trials found that although the intervention seemed to effectively reduce PTS among recipients  
19  
20 70 overall, a third of them had persisting symptoms of hyperarousal [21]. These findings highlight the  
21  
22 71 necessity of further investigating factors contributing to individual differences in treatment  
23  
24 72 outcome. Yet, this matter has been explored by only a few studies [22] which were often limited by  
25  
26 73 small sample sizes and thus lack the necessary statistical power to yield reliable findings. One IPD-  
27  
28 74 MA on PM+ and SbS trials which is currently carried out (see [23], for the study protocol) will  
29  
30 75 hopefully shed light on moderators influencing treatment effects of such low-threshold  
31  
32 76 interventions. However, results will be limited to PM+ and SbS trials only.  
33  
34  
35  
36  
37

38 77 To paint a more complete picture, the present study aims to conduct an IPD-MA, in which  
39  
40 78 datasets from separate RCTs including both psychological and psychosocial interventions will be  
41  
42 79 synthesised. IPD-MAs are considered the *gold standard* of statistical approaches when synthesising  
43  
44 80 and analysing evidence from multiple studies [24]. By merging different IPD datasets with each  
45  
46 81 other, a much larger sample size is reached than when looking at a single-study dataset, an  
47  
48 82 advantage which allows for more complex analyses with statistical power and precision large enough  
49  
50 83 to detect significant moderators of treatment effects and examine predictors of rare events such as  
51  
52 84 adverse outcomes [25]. Additionally, the use of an IPD-MA will allow us to shed light also on  
53  
54 85 moderators of treatment effects at client-level, something previous traditional meta-analyses using  
55  
56 86 reported meta-data could not address as they are restricted to moderators at study-level [26].  
57  
58  
59  
60

1  
2  
3 87 Moreover, by including trials using specialised and low-threshold interventions we will be able to  
4  
5 88 examine whether interventions delivered by specialists and non-specialists differ in terms of  
6  
7 89 treatment effects and moderators thereof. Specifically, for this IPD-MA we aim to: 1) investigate  
8  
9 90 treatment effects; 2) identify beneficiary, provider, intervention, and study characteristics that  
10  
11 91 moderate treatment outcome with regard to PTS symptom reduction among adult FDP receiving  
12  
13 92 psychological and psychosocial interventions compared to controls receiving no intervention; and 3)  
14  
15 93 extend the latter analysis to secondary outcomes including mental health outcomes other than PTS,  
16  
17 94 non-response, attendance, attrition, and adverse outcomes (see section “statistical analysis” for  
18  
19 95 more details).  
20  
21  
22

## 23 96 **METHODS AND ANALYSIS**

### 24 97 ***Eligibility criteria***

25  
26  
27 98 We will include trials that *a*) used an RCT study design including *b*) adult ( $\geq 18$  years) FDP (i.e.,  
28  
29 99 refugees, asylum seekers, or internally displaced persons, as defined by the [27]) receiving *c*)  
30  
31 100 psychological and psychosocial interventions (e.g., specific interventions such as CBT, low-intensity  
32  
33 101 interventions such as PM+, or guided (e.g., SbS) or unguided self-help programs) or *d*) a control  
34  
35 102 condition without intervention (i.e., no treatment, waiting-list, or case-as-usual), and which *e*) assess  
36  
37 103 PTS symptoms as outcome. Trials which included only a subsample of individuals with a forced-  
38  
39 104 displacement background will be still included in this IPD-MA, if the target sample in the dataset can  
40  
41 105 be identified.  
42  
43  
44  
45  
46  
47

### 48 106 ***Identification and selection of studies***

49  
50  
51 107 We conducted a systematic literature search in the databases MEDLINE, PsycINFO, PTSDpubs,  
52  
53 108 Cochrane, and Embase using search terms related to the population (i.e., FDP), intervention (i.e.,  
54  
55 109 psychological and psychosocial interventions), mental health outcomes (i.e., general distress, PTS,  
56  
57 110 depression, or anxiety), and study design (i.e., RCT). The search terms were identified through  
58  
59  
60

1  
2  
3 111 researchers and clinicians from the field; however, the target population was not consulted. The  
4  
5 112 time range was not specified. Inclusion of studies were restricted to the following languages: English,  
6  
7 113 German, French, Spanish, Portuguese, and Dutch. Additionally, we searched the bibliographies and  
8  
9 114 citations of 29 reviews and meta-analyses related to the topic. This search for relevant records  
10  
11 115 provided by newly published reviews and meta-analytic work will be repeated before conducting the  
12  
13 116 analyses. Their references, the detailed search syntax, and the full search strings of each database  
14  
15 117 can be seen here: [https://osf.io/cbw3q/?view\\_only=2c42dff3c25a440cbd5a833e29e35c0b](https://osf.io/cbw3q/?view_only=2c42dff3c25a440cbd5a833e29e35c0b). The full  
16  
17 118 search strategy is included in the **supplementary file**. Before conducting any analyses, we will add  
18  
19 119 the citations and bibliographies of all included articles to the screening process.  
20  
21  
22  
23

24 120 First, titles and abstracts of retrieved records will be screened independently by two raters  
25  
26 121 to identify studies that potentially meet the inclusion criteria outlined above. Second, the full-texts  
27  
28 122 of these potentially eligible studies will be retrieved and independently assessed for eligibility by the  
29  
30 123 same raters. Any disagreement between raters will be resolved through discussion with a senior  
31  
32 124 rater where necessary. Retrieved records will be evaluated throughout the review process with the  
33  
34 125 software COVIDENCE (<https://www.covidence.org/>).  
35  
36  
37

### 38 126 ***Data collection, extraction, and preparation***

39  
40  
41 127 Authors of relevant trials identified in the selection process will be contacted to request anonymised  
42  
43 128 data of their studies, i.e., IPD including, but not limited to, the following variables: beneficiaries'  
44  
45 129 sociodemographic (e.g., education), migratory (e.g., time spent in host country), and clinical  
46  
47 130 characteristics (e.g., trauma history) and providers' (e.g., degree of training), intervention (e.g.,  
48  
49 131 format), and study characteristics (e.g., study setting). According to [28], the success to obtain IPD  
50  
51 132 from authors is moderate (i.e., 58% success rate). In order to incentivise authors to share their data,  
52  
53 133 we will offer two co-authorships per trial and contact all authors of each article at least three times,  
54  
55 134 as suggested by [29].  
56  
57  
58  
59  
60

1  
2  
3 135 After gathering all primary datasets of the eligible studies, automated data quality checks for  
4  
5 136 IPD will be run and data accuracy will be checked by comparing the frequencies of sociodemographic  
6  
7 137 and clinical variables, as well as their mean scores and standard deviations of continuous scales.  
8  
9  
10 138 Inconsistencies (e.g., extreme values or discrepancies between the reported values and the  
11  
12 139 delivered data) will be discussed and clarified with the authors of the primary trials. After confirming  
13  
14 140 the accuracy of each dataset, we will first synchronise variables of interest to the same scale or  
15  
16 141 categorical order and then merge the data into one large IPD meta-analytic dataset. If variables were  
17  
18 142 assessed by several measures, the method with the highest quality standard will be selected (e.g.,  
19  
20 143 clinical interviews will be favoured over self-report measures). Finally, outcome measures will be  
21  
22 144 standardised by converting them to z-scores for each trial separately if multiple measures had been  
23  
24 145 used for the same outcome (according to the procedure used by [30]).  
25  
26  
27

#### 28 146 **Quality assessment**

29  
30  
31 147 The quality of included studies will be checked by two independent raters using the Revised  
32  
33 148 Cochrane tool (RoB2.0) for assessing risk of bias in RCT [31]. This tool assesses several domains  
34  
35 149 including bias from the randomisation process, deviations from intended interventions, and  
36  
37 150 measurement of the outcome. Two bias categories, i.e., “bias from missing outcome data” and  
38  
39 151 “selection from the reported result”, will not be assessed with the RoB tool. Instead, multiple  
40  
41 152 imputation will be used to account for missing outcome data. The bias category “selection of the  
42  
43 153 reported result” is not applicable for IPD-MA as we will have access to the full datasets of all  
44  
45 154 included studies. Each item will be evaluated regarding its risk resulting in a low or high risk of bias  
46  
47 155 judgement per domain. Authors will be contacted in case of unclear items.  
48  
49  
50

#### 51 156 **Statistical analysis**

52  
53  
54  
55 157 As PTSD is the most prevalent mental disorder in FDP [5], the primary outcome will be PTS  
56  
57 158 symptoms assessed at post-intervention (PT; i.e., immediately after treatment) and follow-up (FU; at  
58  
59 159 any later time). However, in order to paint a more complete picture, we will run analyses with  
60

1  
2  
3 160 secondary outcomes including positive mental health outcomes (e.g., well-being), psychopathology  
4  
5 161 (e.g., depression), disability, functioning, and quality of life at PT and FU assessments, as well as  
6  
7 162 adverse outcomes, attendance, attrition, and treatment non-response. Moderator variables at  
8  
9 163 client-level will depend on available IPD provided by the authors and will be included as moderators  
10  
11 164 in the analyses if they are represented by at least three studies. Moderator variables at study-level  
12  
13 165 will be extracted from the published manuscript and will consist of variables such as region where  
14  
15 166 study was conducted (i.e., low-/middle-income vs. high-income countries), time of assessments, and  
16  
17 167 quality of study (assessed in the risk of bias quality assessment). In order to examine differences in  
18  
19 168 treatment effects, we will include type of intervention (i.e., low-threshold interventions vs.  
20  
21 169 specialised therapy) as a moderator in the analyses. Before running any main analyses (see below),  
22  
23 170 we will first test all assumptions necessary for linear regression models using DHARMA  
24  
25 171 (<https://cran.r-project.org/web/packages/DHARMA/vignettes/DHARMA.html>).

26  
27  
28  
29  
30 172 The analyses will be conducted according to the intention-to-treat principle, i.e., all  
31  
32 173 randomised participants will be included in the analyses regardless of rationale for exclusion.  
33  
34 174 Multiple imputation per trial will be conducted using 100 imputations through the mvn method in  
35  
36 175 STATA software, StataCorp, as recommended by [32]. To estimate the missing values, complete  
37  
38 176 baseline variables will be used (e.g., PTS symptom levels at baseline, age, gender, etc.). To assess the  
39  
40 177 difference between imputed and complete values we will conduct a sensitivity analysis using  
41  
42 178 complete cases only. For the primary analyses, we will use the one-stage approach with IPD.  
43  
44 179 Additionally, to compare effects of both type of trials, i.e., those that provided IPD and those that  
45  
46 180 did not, an aggregate data meta-analysis using a two-stage approach including all IPD (transformed)  
47  
48 181 and available meta-data from study reports will be conducted. This is particularly advisable when a  
49  
50 182 large proportion of authors did not share their datasets [33-34]. Results from both the one- and two-  
51  
52 183 stage approach will be compared and discrepancies will be discussed [35]. As we will run several  
53  
54 184 analyses with different outcome variables, we will correct for multiple testing (i.e., Bonferroni  
55  
56 185 adjusted p-values) for analyses including secondary outcome variables. Analyses of the one-stage

1  
2  
3 186 approach will be conducted using the STATA software, while all analyses of the two-stage approach  
4  
5 187 and assumptions tests will be performed using the statistical program R ([https://www.r-](https://www.r-project.org/)  
6  
7  
8 188 [project.org/](https://www.r-project.org/)).

9  
10  
11 189 *One-stage approach: analysis of IPD (primary analyses)*

12  
13 190 To investigate treatment effects of psychological and psychosocial interventions, we will perform a  
14  
15 191 multilevel mixed-effects linear regression model with a random effect for each trial and fixed effects  
16  
17 192 for intervention condition (treatment vs. control) and severity of PTS symptoms at baseline. The  
18  
19 193 severity of PTS symptoms at PT and FU will be used as the dependent variable. To identify  
20  
21 194 moderators of treatment effects, we will add an interaction between each potential moderator and  
22  
23 195 PTS outcome into the multilevel mixed-effects linear regression model. This procedure will be  
24  
25 196 repeated for all aforementioned secondary outcome variables.

26  
27  
28  
29  
30 197 *Two-stage approach: analysis of aggregate data (secondary analyses)*

31  
32 198 First, we will calculate effect sizes for each trial separately and then compare them across studies by  
33  
34 199 running aggregate data meta-analyses including both, trials providing IPD and studies providing only  
35  
36 200 meta-data, in order to examine potential discrepancies in results. Thus, we will run multivariate  
37  
38 201 meta-analyses with standardised mean differences (i.e., Hedges  $g$ ; [36]) using a random-effects  
39  
40 202 model estimated by restricted maximum likelihood accounting for differences in trials [37-38]. In  
41  
42 203 order to identify moderators of treatment effects, we will first run several multiple linear regression  
43  
44 204 models, including all potential moderators as independent variables and change in PTS symptom  
45  
46 205 scores from baseline to PT and FU assessments as dependent variables for each trial separately. The  
47  
48 206 obtained standardised regression coefficients will then be used as dependent variables when  
49  
50 207 running several multivariate regression models with a random effect controlling for trial for each  
51  
52 208 moderator separately. This procedure will be repeated for all secondary outcome variables  
53  
54 209 mentioned above.  
55  
56  
57  
58  
59  
60



1  
2  
3 210 *Heterogeneity (two-stage approach)*  
4  
5

6 211 To quantify variation among studies we will conduct analyses of heterogeneity by using Cochran's  $Q$ ,  
7  
8 212 prediction intervals, and  $I^2$  statistic [39-41].  $I^2$  is a measure which quantifies the proportion of  
9  
10 213 observed heterogeneity representing the difference between effects sizes that are not due to  
11  
12 214 sampling error but to differences in, for example, the populations or measures that are studied. It  
13  
14 215 ranges from 0-100% including increments of 0%, 25%, 50%, and 75%, indicating no, low, moderate,  
15  
16 216 and high heterogeneity, respectively [39].  
17  
18  
19

20 217 *Publication bias (two-stage approach)*  
21  
22

23 218 We will assess publication bias by creating "contour-enhanced funnel plots" for a visual evaluation of  
24  
25 219 asymmetry [42] and applying the "trim and fill" method [43].  
26  
27

28 220 *Certainty of evidence*  
29  
30

31 221 To evaluate the confidence in evidence we will apply the Grading of Recommendations, Assessment,  
32  
33 222 Development, and Evaluations (GRADE) methodology for the primary outcome measure [44].  
34  
35

36 223 ***Patient and public involvement***  
37  
38

39 224 None.  
40  
41

42 225 **ETHICS AND DISSEMINATION**  
43  
44

45 226 We issued a clarification of responsibility for which the local ethic committee of the canton of Zurich,  
46  
47 227 Switzerland, confirmed that this IPD-MA does not require ethical approval (Req-2022-00496). Only  
48  
49 228 anonymised datasets will be requested from authors. With signing our data transfer agreement,  
50  
51 229 authors warrant that the provided data had been legally obtained and all necessary consents for the  
52  
53 230 transfer to and use by a third party had been secured. The results will be published in international  
54  
55 231 peer-reviewed journals.  
56  
57  
58

59 232 *Current status*  
60

1  
2  
3 233 The literature search, as well as the screening of titles and abstracts and the full-text review have  
4  
5 234 been partially conducted for this IPD-MA. The systematic literature search in the aforementioned  
6  
7 235 databases had been carried out on 12<sup>th</sup> January 2022 and will be updated prior to conducting the  
8  
9 236 analyses. This project is expected to be completed by December 2025.  
10  
11  
12  
13  
14  
15  
16  
17  
18  
19  
20  
21  
22  
23  
24  
25  
26  
27  
28  
29  
30  
31  
32  
33  
34  
35  
36  
37  
38  
39  
40  
41  
42  
43  
44  
45  
46  
47  
48  
49  
50  
51  
52  
53  
54  
55  
56  
57  
58  
59  
60

For peer review only

1  
2  
3 237 Funding  
4  
5

6 238 This work is supported by the EMDO foundation of the University of Zurich (grant number: 1115)  
7  
8 239 which was received by the principal investigator (and sponsor) of this project (NM). Any  
9  
10 240 contributions to this protocol by the sponsor (NM) are described below.  
11  
12

13 241 Contributors  
14  
15

16 242 All authors contributed to the design of the study. JK drafted the manuscript of this study protocol  
17  
18 243 while AA, EK, PC, RB, NM, and MS were involved in revising the manuscript critically for intellectual  
19  
20 244 content. All authors read and approved the final manuscript. NM holds the role of the guarantor.  
21  
22

23 245 Competing interests  
24  
25

26 246 The authors declare no competing interests.  
27  
28

29 247 **References**  
30  
31

- 32 248 1. United Nations High Commissioner for Refugees. Figures at a glance. June 14, 2023a.  
33  
34 249 <https://www.unhcr.org/figures-at-a-glance.html>  
35  
36 250 2. United Nations High Commissioner for Refugees. June 14, 2023b. UNHCR calls for concerted  
37  
38 251 action as forced displacement hits new record in 2022. [https://www.unhcr.org/news/press-](https://www.unhcr.org/news/press-releases/unhcr-calls-concerted-action-forced-displacement-hits-new-record-2022)  
39  
40 252 [releases/unhcr-calls-concerted-action-forced-displacement-hits-new-record-2022](https://www.unhcr.org/news/press-releases/unhcr-calls-concerted-action-forced-displacement-hits-new-record-2022)  
41  
42 253 3. Drescher A, Kiselev N, Akhtar A, et al. Problems after flight: understanding and comparing  
43  
44 254 Syrians' perspectives in the Middle East and Europe. *BMC Public Health* 2021;21(1):717.  
45  
46 255 4. Steel Z, Chey T, Silove D, et al. Association of torture and other potentially traumatic events  
47  
48 256 with mental health outcomes among populations exposed to mass conflict and  
49  
50 257 displacement: A systematic review and meta-analysis. *JAMA* 2009;302(5):537–549.  
51  
52 258 5. Blackmore R, Gray KM, Boyle, JA, et al. Systematic review and meta-analysis: The prevalence  
53  
54 259 of mental illness in child and adolescent refugees and asylum seekers. *JAACAP*  
55  
56 260 2020;59(6):705–714.  
57  
58  
59  
60

- 1  
2  
3 261 6. Patanè M, Ghane S, Karyotaki E, et al. Prevalence of mental disorders in refugees and asylum  
4  
5 262 seekers: a systematic review and meta-analysis. *Glob Ment Health*, 2022;9:250–263.
- 6  
7 263 7. Schick M, Zumwald A, Knöpfli B, et al. Challenging future, challenging past: the relationship  
8  
9 264 of social integration and psychological impairment in traumatized refugees. *Eur J*  
10  
11 265 *Psychotraumatology*, 2016;7:28057.
- 12  
13  
14 266 8. Crumlish N, O'Rourke K. A systematic review of treatments for post-traumatic stress  
15  
16 267 disorder among refugees and asylum-seekers. *J Nerv Ment Dis* 2010;198(4):237–251.
- 17  
18  
19 268 9. Sijbrandij M, de Graaff A, Cuijpers P, et al. Problem Management Plus (PM+) for Syrian  
20  
21 269 refugees in the Netherlands. *Eur J Public Health* 2020;30:233–234.
- 22  
23 270 10. Cuijpers P, Heim E, Ramia JA, et al. Effects of a WHO-guided digital health intervention for  
24  
25 271 depression in Syrian refugees in Lebanon: a randomized controlled trial. *PLoS Med*  
26  
27 272 2022;19(6), 1–15.
- 28  
29  
30 273 11. Barbui C, Purgato M, Abdulmalik J, et al. Efficacy of psychosocial interventions for mental  
31  
32 274 health outcomes in low-income and middle-income countries: an umbrella review. *Lancet*  
33  
34 275 *Psychiatry* 2020;7(2), 162–172.
- 35  
36  
37 276 12. Lange KW. Task sharing in psychotherapy as a viable global mental health approach in  
38  
39 277 resource-poor countries and also in high-resource settings. *Glob Health J* 2021;5(3):120–127.
- 40  
41 278 13. Kip A, Priebe S, Holling H, et al. Psychological interventions for posttraumatic stress disorder  
42  
43 279 and depression in refugees: A meta-analysis of randomized controlled trials. *Clin Psychol*  
44  
45 280 *Psychother* 2020;27(4):489–503.
- 46  
47  
48 281 14. Wright A, Reisig A, Cullen B. Efficacy and cultural adaptations of narrative exposure therapy  
49  
50 282 for trauma-related outcomes in refugees/asylum-seekers: A systematic review and meta-  
51  
52 283 analysis. *J Behav Cogn* 2020;30(4):301-314.
- 53  
54  
55 284 15. Gwozdziwycz N, Mehl-Madrone L. Meta-analysis of the use of narrative exposure therapy  
56  
57 285 for the effects of trauma among refugee populations. *Perm J* 2013;17(1):70-76.
- 58  
59 286 16. Lambert JE, Alhassoon OM. Trauma-focused therapy for refugees: meta-analytic findings. *J*  
60

- 1  
2  
3 287 *Couns Psychol* 2015;62(1):28.  
4  
5 288 17. Nosè M, Ballette F, Bighelli I, et al. Psychosocial interventions for post-traumatic stress  
6  
7 289 disorder in refugees and asylum seekers resettled in high-income countries: Systematic  
8  
9  
10 290 review and meta-analysis. *PLoS one* 2017;12(2):e0171030. doi:  
11  
12 291 10.1371/journal.pone.0171030  
13  
14 292 18. Nocon A, Eberle-Sejari R, Unterhitzberger J, et al. The effectiveness of psychosocial  
15  
16 293 interventions in war-traumatized refugee and internally displaced minors: Systematic review  
17  
18 294 and meta-analysis. *Eur J Psychotraumatology* 2017;8(sup2):1388709.  
19  
20  
21 295 19. ter Heide FJJ, Smid GE. Difficult to treat? a comparison of the effectiveness of treatment as  
22  
23 296 usual in refugees and non-refugees. *BJPsych Bulletin* 2015 39(4):182–186.  
24  
25 297 20. ter Heide FJJ, Mooren TM, van de Schoot R, et al. Eye movement desensitisation and  
26  
27 298 reprocessing therapy v. stabilisation as usual for refugees: randomised controlled trial.  
28  
29 299 *BJPsych* 2016;209(4):311–318.  
30  
31  
32 300 21. Akhtar A, Koyiet P, Rahman A, et al. Residual posttraumatic stress disorder symptoms after  
33  
34 301 provision of brief behavioral intervention in low-and middle-income countries: An  
35  
36 302 individual-patient data meta-analysis. *Depression and Anxiety* 2022;39(1):71-82.  
37  
38  
39 303 22. Haagen JFG, ter Heide FJJ, Mooren TM, et al. Predicting post-traumatic stress disorder  
40  
41 304 treatment response in refugees: Multilevel analysis. *Br J Clin Psychol* 2017;56(1):69–83.  
42  
43 305 23. de Graaff AM, Cuijpers P, Acarturk C, et al. Scalable psychological interventions for Syrian  
44  
45 306 refugees in Europe and the Middle East: STRENGTHS study protocol for a prospective  
46  
47 307 individual participant data meta-analysis. *BMJ Open* 2022;12(4):e058101. doi:  
48  
49 308 10.1136/bmjopen-2021-058101  
50  
51  
52 309 24. Broeze KA, Opmeer BC, van der Veen F, et al. Individual patient data meta-analysis: A  
53  
54 310 promising approach for evidence synthesis in reproductive medicine. *Hum Reprod Update*  
55  
56 311 2010;16(6):561–567.  
57  
58  
59  
60

- 1  
2  
3 312 25. Smith CT, Oyee J, Marcucci M, et al. Individual participant data meta-analyses compared  
4  
5 313 with meta-analyses based on aggregate data. *Trials* 2011;12(S1), 1–2.  
6  
7 314 26. Lyman GH, Kuderer NM. The strengths and limitations of meta-analyses based on aggregate  
8  
9 315 data. *BMC Med Res Methodol* 2005;5(1):1-7.  
10  
11 316 27. United Nations High Commissioner for Refugees. What is the difference  
12  
13 317 between population statistics for forcibly displaced and the population that UNHCR is  
14  
15 318 mandated to protect and/or assist? October 27, 2022. [https://www.unhcr.org/refugee-](https://www.unhcr.org/refugee-statistics/insights/explainers/forcibly-displaced-pocs.html)  
16  
17 319 [statistics/insights/explainers/forcibly-displaced-pocs.html](https://www.unhcr.org/refugee-statistics/insights/explainers/forcibly-displaced-pocs.html)  
18  
19 320 28. Polanin JR. Efforts to retrieve individual participant data sets for use in a meta-analysis result  
20  
21 321 in moderate data sharing but many data sets remain missing. *J Clin Epidemiol* 2018;98:157-  
22  
23 322 159.  
24  
25 323 29. Ventresca M, Schünemann HJ, Macbeth F, et al. Obtaining and managing data sets for  
26  
27 324 individual participant data meta-analysis: scoping review and practical guide. *BMC Med Res*  
28  
29 325 *Methodol* 2020;20(1):1-18.  
30  
31 326 30. Karyotaki E, Kleiboer A, Smit F, et al. Predictors of treatment dropout in self-guided web-  
32  
33 327 based interventions for depression: an “individual patient data” meta-analysis. *Psychol Med*  
34  
35 328 2015;45(13):2717–2726.  
36  
37 329 31. Sterne JAC, Savović J, Page MJ, et al. RoB 2: A revised tool for assessing risk of bias in  
38  
39 330 randomised trials. *BMJ* 2019;366:1–8.  
40  
41 331 32. Graham JW, Olchowski AE, Gilreath TD. How many imputations are really needed? Some  
42  
43 332 practical clarifications of multiple imputation theory. *Prev Sci* 2007;8(3):206–213.  
44  
45 333 33. Riley RD, Simmonds MC, Look MP. Evidence synthesis combining individual patient data and  
46  
47 334 aggregate data: a systematic review identified current practice and possible methods. *J Clin*  
48  
49 335 *Epidemiol* 2007;60(5):431.e1-431.e12.  
50  
51 336 34. Stewart LA, Tierney JF. To IPD or not to IPD? Advantages and disadvantages of systematic  
52  
53 337 reviews using individual patient data. *Eval Health Prof* 2002;25(1):76–97.  
54  
55  
56  
57  
58  
59  
60

- 1  
2  
3 338 35. Burke DL, Ensor J, Riley, RD. Meta-analysis using individual participant data: one-stage and  
4  
5 339 two-stage approaches, and why they may differ. *Stat Med* 2017;36(5):855–875.  
6  
7 340 36. Hedges LV. Distribution theory for Glass's estimator of effect size and related estimators. *J*  
8  
9 341 *Educ Stat* 1981;6(2):107-128.  
10  
11 342 37. Bartlett MS. Properties of sufficiency and statistical tests. *Proc R Soc A: Math Phys Eng Sci*  
12  
13 343 1937;160(901):268-282.  
14  
15 344 38. Viechtbauer W. Conducting meta-analyses in R with the metafor. *J Stat Softw* 2010;36(3):1–  
16  
17 345 48.  
18  
19 346 39. Borenstein M, Hedges L, Rothstein H. Introduction to meta-analysis. In *John Wiley & Sons,*  
20  
21 347 *Chichester* (Vol. 16, Issue 5). 2009.  
22  
23 348 40. Ioannidis JPA, Patsopoulos NA, Evangelou E. Uncertainty in heterogeneity estimates in meta-  
24  
25 349 analyses. *BMJ* 2007;335(7626):914–916.  
26  
27 350 41. Vo TT, Porcher R, Vansteelandt S. Assessing the impact of case-mix heterogeneity in  
28  
29 351 individual participant data meta-analysis: Novel use of I<sup>2</sup> statistic and prediction interval.  
30  
31 352 *Res Meth Med Health Sci* 2021;2(1):12–30.  
32  
33 353 42. Peters JL, Sutton AJ, Jones DR, et al. Contour-enhanced meta-analysis funnel plots help  
34  
35 354 distinguish publication bias from other causes of asymmetry. *J Clin Epidemiol*  
36  
37 355 2008;61(10):991-996.  
38  
39 356 43. Duval S, Tweedie R. A nonparametric “trim and fill” method of accounting for publication  
40  
41 357 bias in meta-analysis. *JASA* 2000;95(449):89–98.  
42  
43 358 44. Piggott T, Morgan RL, Cuello-Garcia CA, et al. Grading of Recommendations Assessment,  
44  
45 359 Development, and Evaluations (GRADE) notes: extremely serious, GRADE's terminology for  
46  
47 360 rating down by three levels. *J Clin Epidemiol* 2020;120:116-120.  
48  
49  
50  
51  
52  
53  
54  
55  
56  
57  
58  
59  
60

## POTENTIAL project - Full search strategy

We conducted a systematic literature search in the databases MEDLINE, PsycINFO, PTSDpubs, Cochrane, and Embase using search terms related to the population (i.e., FDP), intervention (i.e., psychological and psychosocial interventions), mental health outcomes (i.e., general distress, PTS, depression, or anxiety), and study design (i.e., RCT). The search terms were identified through researchers and clinicians from the field; however, the target population was not consulted. The time range was not specified, the start date therefore depended on the inception of the databases. Inclusion of studies were restricted to the following languages: English, German, French, Spanish, Portuguese, and Dutch. Additionally, we searched the bibliographies and citations of 29 reviews and meta-analyses related to the topic. This search for relevant records provided by newly published reviews and meta-analytic work will be repeated before conducting the analyses. Before conducting any analyses, we will add the citations and bibliographies of all included articles to the screening process.

References of reviews and meta-analyses as an additional source:

- Ahmadi Forooshani, S., Izadikhah, Z., Renzaho, A. M. N., & O'Connor, P. J. (2021). Effectiveness of Psychological Interventions on Young Refugees' Social Adjustment: A Meta-Analysis. *Journal of Refugee Studies*, 34(1), 976–992. <https://doi.org/10.1093/jrs/fez035>
- Barbui, C., Purgato, M., Abdulmalik, J., Acarturk, C., Eaton, J., Gastaldon, C., Gureje, O., Hanlon, C., Jordans, M., Lund, C., Nosè, M., Ostuzzi, G., Papola, D., Tedeschi, F., Tol, W., Turrini, G., Patel, V., & Thornicroft, G. (2020). Efficacy of psychosocial interventions for mental health outcomes in low-income and middle-income countries: an umbrella review. *The Lancet Psychiatry*, 7(2), 162–172. [https://doi.org/10.1016/S2215-0366\(19\)30511-5](https://doi.org/10.1016/S2215-0366(19)30511-5)
- Crumlish, N., & O'Rourke, K. (2010). A systematic review of treatments for post-traumatic stress disorder among refugees and asylum-seekers. *Journal of Nervous and Mental Disease*, 198(4), 237–251. <https://doi.org/10.1097/NMD.0b013e3181d61258>
- Gwozdziejwycz, N., & Mehl-Madrone, L. (2013). Meta-analysis of the use of narrative exposure therapy for the effects of trauma among refugee populations. *The Permanente Journal*, 17(1), 70–76. <https://doi.org/10.7812/tpp/12-058>
- Hamid, A., Patel, N., & De C Williams, A. C. (2019). Psychological, social, and welfare interventions for torture survivors: a systematic review and meta-analysis of randomised controlled trials. *PLoS Medicine*, 16(9), 1–16. <https://doi.org/10.1371/journal.pmed.1002919>
- Kip, A., Priebe, S., Holling, H., & Morina, N. (2020). Psychological interventions for posttraumatic stress disorder and depression in refugees: A meta-analysis of randomized controlled trials. *Clinical Psychology & Psychotherapy*. <https://doi.org/10.1002/cpp.2446>
- Lambert, J. E., & Alhassoon, O. M. (2015). Trauma-focused therapy for refugees: meta-analytic findings. *Journal of Counseling Psychology*, 62(1), 28–37. <https://doi.org/10.1037/cou0000048>



- 1
  - 2
  - 3
  - 4
  - 5
  - 6
  - 7
  - 8
  - 9
  - 10
  - 11
  - 12
  - 13
  - 14
  - 15
  - 16
  - 17
  - 18
  - 19
  - 20
  - 21
  - 22
  - 23
  - 24
  - 25
  - 26
  - 27
  - 28
  - 29
  - 30
  - 31
  - 32
  - 33
  - 34
  - 35
  - 36
  - 37
  - 38
  - 39
  - 40
  - 41
  - 42
  - 43
  - 44
  - 45
  - 46
  - 47
  - 48
  - 49
  - 50
  - 51
  - 52
  - 53
  - 54
  - 55
  - 56
  - 57
  - 58
  - 59
  - 60
- McFarlane, C. A., & Kaplan, I. (2012). Evidence-based psychological interventions for adult survivors of torture and trauma: a 30-year review. *Transcultural Psychiatry*, 49(3–4), 539–567. <https://doi.org/10.1177/1363461512447608>
  - Nakeyar, C., & Frewen, P. A. (2016). Evidence-based care for Iraqi, Kurdish, and Syrian asylum seekers and refugees of the Syrian civil war: a systematic review. *Canadian Psychology*, 57(4), 235–245. <https://doi.org/10.1037/cap0000067>
  - Nickerson, A., Bryant, R. A., Silove, D., & Steel, Z. (2011). A critical review of psychological treatments of posttraumatic stress disorder in refugees. *Clinical Psychology Review*, 31(3), 399–417. <https://doi.org/10.1016/j.cpr.2010.10.004>
  - Nocon, A., Eberle-Sejari, R., Unterhitzberger, J., & Rosner, R. (2017). The effectiveness of psychosocial interventions in war-traumatized refugee and internally displaced minors: Systematic review and meta-analysis. *European Journal of Psychotraumatology*, 8(Suppl 2), 1–15. <https://doi.org/10.1080/20008198.2017.1388709>
  - Nosè, M., Ballette, F., Bighelli, I., Turrini, G., Purgato, M., Tol, W., Priebe, S., & Barbui, C. (2017). Psychosocial interventions for post-traumatic stress disorder in refugees and asylum seekers resettled in high-income countries: Systematic review and meta-analysis. *PloS One*, 12(2), e0171030. <https://doi.org/10.1371/journal.pone.0171030>
  - Patel, N., Kellezi, B., & Williams, A. C. de C. (2014). Psychological, social and welfare interventions for psychological health and well-being of torture survivors. *The Cochrane Database of Systematic Reviews*, 11, CD009317. <https://doi.org/10.1002/14651858.CD009317.pub2>
  - Purgato, M., Gastaldon, C., Papola, D., van Ommeren, M., Barbui, C., & Tol, W. A. (2018). Psychological therapies for the treatment of mental disorders in low-and middle-income countries affected by humanitarian crises. *Cochrane Database of Systematic Reviews*, 2018(7). <https://doi.org/10.1002/14651858.CD011849.pub2>
  - Robjant, K., & Fazel, M. (2010). The emerging evidence for narrative exposure therapy: A review. *Clinical Psychology Review*, 30(8), 1030–1039. <https://doi.org/10.1016/j.cpr.2010.07.004>
  - Rolfnes, E. S., & Idsoe, T. (2007). Prevalence and Psychological Correlates of Complicated. *Journal of Traumatic Stress*, 20(3), 251–262. <https://doi.org/10.1002/jts>
  - Sambucini, D., Aceto, P., Begotaraj, E., & Lai, C. (2020). Efficacy of Psychological Interventions on Depression Anxiety and Somatization in Migrants: A Meta-analysis. *Journal of Immigrant and Minority Health*, 22(6), 1320–1346. <https://doi.org/10.1007/s10903-020-01055-w>
  - Slobodin, O., & de Jong, J. T. V. M. (2015). Family interventions in traumatized immigrants and refugees: a systematic review. *Transcultural Psychiatry*, 52(6), 723–742. <https://doi.org/10.1177/1363461515588855>
  - Sullivan, A. L., & Simonson, G. R. (2016). A systematic review of school-based social-emotional interventions for refugee and war-traumatized youth. *Review of Educational Research*, 86(2), 503–530. <https://doi.org/10.3102/0034654315609419>
  - Sykinioti, S. (2019). The effectiveness of eye movement desensitisation and reprocessing with refugees experiencing symptoms of posttraumatic stress disorder. *European Journal of Trauma & Dissociation*, 3(1), 49–55. <https://doi.org/10.1016/j.ejtd.2018.08.001>
  - Thompson, C. T., Vidgen, A., & Roberts, N. P. (2018). Psychological interventions for post-traumatic stress disorder in refugees and asylum seekers: a systematic review

and meta-analysis. *Clinical Psychology Review*, 63, 66–79.

<https://doi.org/10.1016/j.cpr.2018.06.006>

- Tribe, R. H., Sendt, K.-V., & Tracy, D. K. (2019). A systematic review of psychosocial interventions for adult refugees and asylum seekers. *Journal of Mental Health (Abingdon, England)*, 28(6), 662–676. <https://doi.org/10.1080/09638237.2017.1322182>
- Turrini, G., Purgato, M., Acarturk, C., Anttila, M., Au, T., Ballette, F., Bird, M., Carswell, K., Churchill, R., Cuijpers, P., Hall, J., Hansen, L. J., Kösters, M., Lantta, T., Nosè, M., Ostuzzi, G., Sijbrandij, M., Tedeschi, F., Valimaki, M., ...Barbui, C. (2019). Efficacy and acceptability of psychosocial interventions in asylum seekers and refugees: Systematic review and meta-analysis. *Epidemiology and Psychiatric Sciences*, 28(4), 376–388. <https://doi.org/10.1017/S2045796019000027>
- Turrini, Giulia, Barbui, C., & Nosè, M. (2017). Psychosocial interventions for post-traumatic stress disorder in refugees and asylum seekers. *Rivista Sperimentale Di Freniatria: La Rivista Della Salute Mentale*, 141(3), 51–66. <https://doi.org/10.3280/RSF2017-003004>
- Turrini, Giulia, Tedeschi, F., Cuijpers, P., Del Giovane, C., Kip, A., Morina, N., Nosè, M., Ostuzzi, G., Purgato, M., Ricciardi, C., Sijbrandij, M., Tol, W., & Barbui, C. (2021). A network meta-analysis of psychosocial interventions for refugees and asylum seekers with PTSD. *BMJ Global Health*, 6(6). <https://doi.org/10.1136/bmjgh-2021-005029>
- Tyrer, R. A., & Fazel, M. (2014). School and community-based interventions for refugee and asylum seeking children: A systematic review. *PLoS ONE*, 9(2). <https://doi.org/10.1371/journal.pone.0089359>
- van Wyk, S., & Schweitzer, R. D. (2014). A Systematic Review of Naturalistic Interventions in Refugee Populations. *Journal of Immigrant and Minority Health*, 16(5), 968–977. <https://doi.org/10.1007/s10903-013-9835-3>
- Williams, M. E., & Thompson, S. C. (2011). The use of community-based interventions in reducing morbidity from the psychological impact of conflict-related trauma among refugee populations: A systematic review of the literature. *Journal of Immigrant and Minority Health*, 13(4), 780–794. <https://doi.org/10.1007/s10903-010-9417-6>
- Wright, A., Reisig, A., & Cullen, B. (2020). Efficacy and cultural adaptations of narrative exposure therapy for trauma-related outcomes in refugees/asylum-seekers: A systematic review and meta-analysis. *Journal of Behavioral and Cognitive Therapy*, 30(4), 301–314. <https://doi.org/10.1016/j.jbct.2020.10.003>

#### Search strings

- Embase

Advanced search - ALL FIELDS:

*(refugee\* OR 'asylum seeker\*' OR 'forcibly displaced' OR 'forced displacement' OR 'internally displaced' OR 'civilian war survivor\*' OR 'civilian survivor\*' OR 'civilian war victim\*') AND (treatment\* OR intervention\* OR therap\* OR psychother\* OR counsel\* OR behavio\* OR psychologist\* OR psychosoci\* OR program\* OR low) AND (pts OR 'post-traumatic stress' OR ptsd OR 'post-traumatic stress disorder' OR 'post-traumatic symptom\*' OR 'mental health' OR 'mental illness' OR 'mental disorder' OR 'mental distress' OR 'emotion\* distress' OR 'psycho\* distress' OR*

*anxiety OR depression OR mdd) AND (rct OR random\* OR trial\* OR controlled OR allocat\* OR assign\*)*

- Cochrane

Advanced search – Title Abstract Keywords:

*(refugee\* OR "asylum seeker\*" OR "forcibly displaced" OR "forced displacement" OR "internally displaced" OR "civilian war survivor\*" OR "civilian survivor\*" OR "civilian war victim\*") AND (treatment\* OR intervention\* OR therap\* OR psychother\* OR counsel\* OR behavio\* OR psychologist\* OR psychosoci\* OR program\* OR low) AND (PTS OR "post-traumatic stress" OR PTSD OR "post-traumatic stress disorder" OR "post-traumatic symptom\*" OR "mental health" OR "mental illness" OR "mental disorder" OR "mental distress" OR "emotion\* distress" OR "psycho\* distress" OR anxiety OR depression OR MDD) AND (RCT OR random\* OR trial\* OR controlled OR allocat\* OR assign\*)*

- PTSDpubs

Advanced search – Anywhere:

*(refugee\* OR "asylum seeker\*" OR "forcibly displaced" OR "forced displacement" OR "internally displaced" OR "civilian war survivor\*" OR "civilian survivor\*" OR "civilian war victim\*") AND (treatment\* OR intervention\* OR therap\* OR psychother\* OR counsel\* OR behavio\* OR psychologist\* OR psychosoci\* OR program\* OR low) AND (PTS OR "post-traumatic stress" OR PTSD OR "post-traumatic stress disorder" OR "post-traumatic symptom\*" OR "mental health" OR "mental illness" OR "mental disorder" OR "mental distress" OR "emotion\* distress" OR "psycho\* distress" OR anxiety OR depression OR MDD) AND (RCT OR random\* OR trial\* OR controlled OR allocat\* OR assign\*)*

- Medline

Advanced search - Select a field (optional):

*( refugee\* OR "asylum seeker\*" OR "forcibly displaced" OR "forced displacement" OR "internally displaced" OR "civilian war survivor\*" OR "civilian survivor\*" OR "civilian war victim\*" ) AND ( treatment\* OR intervention\* OR therap\* OR psychother\* OR counsel\* OR behavio\* OR psychologist\* OR psychosoci\* OR program\* OR low ) AND ( PTS OR "post-traumatic stress" OR PTSD OR "post-traumatic stress disorder" OR "post-traumatic symptom\*" OR "mental health" OR "mental illness" OR "mental disorder" OR "mental distress" OR "emotion\* distress" OR "psycho\* distress" OR anxiety OR depression OR MDD ) AND ( RCT OR random\* OR trial\* OR controlled OR allocat\* OR assign\* )*

- PsycINFO

Advanced search - Select a field (optional):

*( refugee\* OR "asylum seeker\*" OR "forcibly displaced" OR "forced displacement" OR "internally displaced" OR "civilian war survivor\*" OR "civilian survivor\*" OR "civilian war victim\*" ) AND ( treatment\* OR intervention\* OR therap\* OR psychother\* OR counsel\* OR behavio\* OR psychologist\* OR psychosoci\* OR program\* OR low ) AND ( PTS OR "post-traumatic stress" OR PTSD OR "post-traumatic stress disorder" OR "post-traumatic symptom\*" OR "mental health" OR "mental illness" OR "mental disorder" OR "mental distress" OR "emotion\* distress" OR "psycho\* distress" OR anxiety OR depression OR MDD ) AND ( RCT OR random\* OR trial\* OR controlled OR allocat\* OR assign\* )*

**PRISMA-P (Preferred Reporting Items for Systematic review and Meta-Analysis Protocols) 2015 checklist: recommended items to address in a systematic review protocol\***

| Section and topic                 | Item No | Checklist item                                                                                                                                                                                                                                     |
|-----------------------------------|---------|----------------------------------------------------------------------------------------------------------------------------------------------------------------------------------------------------------------------------------------------------|
| <b>ADMINISTRATIVE INFORMATION</b> |         |                                                                                                                                                                                                                                                    |
| Title:                            |         |                                                                                                                                                                                                                                                    |
| Identification                    | 1a      | Identify the report as a protocol of a systematic review => report is identified as a protocol of an individual patient data meta-analyses, see p. 1                                                                                               |
| Update                            | 1b      | If the protocol is for an update of a previous systematic review, identify as such => NA                                                                                                                                                           |
| Registration                      | 2       | If registered, provide the name of the registry (such as PROSPERO) and registration number => see line 25                                                                                                                                          |
| Authors:                          |         |                                                                                                                                                                                                                                                    |
| Contact                           | 3a      | Provide name, institutional affiliation, e-mail address of all protocol authors; provide physical mailing address of corresponding author => see p. 1                                                                                              |
| Contributions                     | 3b      | Describe contributions of protocol authors and identify the guarantor of the review => see lines 240-243                                                                                                                                           |
| Amendments                        | 4       | If the protocol represents an amendment of a previously completed or published protocol, identify as such and list changes; otherwise, state plan for documenting important protocol amendments => NA                                              |
| Support:                          |         |                                                                                                                                                                                                                                                    |
| Sources                           | 5a      | Indicate sources of financial or other support for the review => see lines 236-239                                                                                                                                                                 |
| Sponsor                           | 5b      | Provide name for the review funder and/or sponsor => see lines 236-239                                                                                                                                                                             |
| Role of sponsor or funder         | 5c      | Describe roles of funder(s), sponsor(s), and/or institution(s), if any, in developing the protocol => see lines 240-243                                                                                                                            |
| <b>INTRODUCTION</b>               |         |                                                                                                                                                                                                                                                    |
| Rationale                         | 6       | Describe the rationale for the review in the context of what is already known => see lines 38-76                                                                                                                                                   |
| Objectives                        | 7       | Provide an explicit statement of the question(s) the review will address with reference to participants, interventions, comparators, and outcomes (PICO) => see lines 89-95                                                                        |
| <b>METHODS</b>                    |         |                                                                                                                                                                                                                                                    |
| Eligibility criteria              | 8       | Specify the study characteristics (such as PICO, study design, setting, time frame) and report characteristics (such as years considered, language, publication status) to be used as criteria for eligibility for the review => see lines 100-107 |
| Information sources               | 9       | Describe all intended information sources (such as electronic databases, contact with study authors, trial registers or other grey literature sources) with planned dates of coverage => see lines 109-121                                         |
| Search strategy                   | 10      | Present draft of search strategy to be used for at least one electronic database, including planned limits, such that it could be repeated => see lines 119-121                                                                                    |
| Study records:                    |         |                                                                                                                                                                                                                                                    |

|                                    |     |                                                                                                                                                                                                                                                                                |
|------------------------------------|-----|--------------------------------------------------------------------------------------------------------------------------------------------------------------------------------------------------------------------------------------------------------------------------------|
| Data management                    | 11a | Describe the mechanism(s) that will be used to manage records and data throughout the review => see lines 126-127 / 137-147                                                                                                                                                    |
| Selection process                  | 11b | State the process that will be used for selecting studies (such as two independent reviewers) through each phase of the review (that is, screening, eligibility and inclusion in meta-analysis) => see lines 122-127                                                           |
| Data collection process            | 11c | Describe planned method of extracting data from reports (such as piloting forms, done independently, in duplicate), any processes for obtaining and confirming data from investigators => see lines 129-136                                                                    |
| Data items                         | 12  | List and define all variables for which data will be sought (such as PICO items, funding sources), any pre-planned data assumptions and simplifications => see lines 129-133 / 166-169                                                                                         |
| Outcomes and prioritization        | 13  | List and define all outcomes for which data will be sought, including prioritization of main and additional outcomes, with rationale => see lines 159-164                                                                                                                      |
| Risk of bias in individual studies | 14  | Describe anticipated methods for assessing risk of bias of individual studies, including whether this will be done at the outcome or study level, or both; state how this information will be used in data synthesis => see lines 149-157 / 166-169                            |
| Data synthesis                     | 15a | Describe criteria under which study data will be quantitatively synthesised => see lines 164-166                                                                                                                                                                               |
|                                    | 15b | If data are appropriate for quantitative synthesis, describe planned summary measures, methods of handling data and methods of combining data from studies, including any planned exploration of consistency (such as I <sup>2</sup> , Kendall's $\tau$ ) => see lines 211-216 |
|                                    | 15c | Describe any proposed additional analyses (such as sensitivity or subgroup analyses, meta-regression) => see lines 195-198 / 199-210                                                                                                                                           |
|                                    | 15d | If quantitative synthesis is not appropriate, describe the type of summary planned => NA                                                                                                                                                                                       |
| Meta-bias(es)                      | 16  | Specify any planned assessment of meta-bias(es) (such as publication bias across studies, selective reporting within studies) => see lines 217-219                                                                                                                             |
| Confidence in cumulative evidence  | 17  | Describe how the strength of the body of evidence will be assessed (such as GRADE) => see lines 220-222                                                                                                                                                                        |

**\* It is strongly recommended that this checklist be read in conjunction with the PRISMA-P Explanation and Elaboration (cite when available) for important clarification on the items. Amendments to a review protocol should be tracked and dated. The copyright for PRISMA-P (including checklist) is held by the PRISMA-P Group and is distributed under a Creative Commons Attribution Licence 4.0.**

*From: Shamseer L, Moher D, Clarke M, Ghersi D, Liberati A, Petticrew M, Shekelle P, Stewart L, PRISMA-P Group. Preferred reporting items for systematic review and meta-analysis protocols (PRISMA-P) 2015: elaboration and explanation. BMJ. 2015 Jan 2;349(jan02 1):g7647.*
