# Supplementary material for: What works for whom and why? Treatment effects and their moderators among forcibly displaced people receiving psychological and psychosocial interventions: study protocol for an individual patient data meta-analysis
Source: PubMed Central journal article supplement — BMJ Open. 2024 Feb 2;14(2):e078473. doi: 10.1136/bmjopen-2023-078473 (PMC10840047; doi:10.1136/bmjopen-2023-078473), 2024-02-02
Supplement: bmjopen-2023-078473supp001.pdf [file bmjopen-2023-078473supp001.pdf]

## POTENTIAL project - Full search strategy

We conducted a systematic literature search in the databases MEDLINE, PsycINFO, PTSDpubs, Cochrane, and Embase using search terms related to the population (i.e., FDP), intervention (i.e., psychological and psychosocial interventions), mental health outcomes (i.e., general distress, PTS, depression, or anxiety), and study design (i.e., RCT). The search terms were identified through researchers and clinicians from the field; however, the target population was not consulted. The time range was not specified, the start date therefore depended on the inception of the databases. Inclusion of studies were restricted to the following languages: English, German, French, Spanish, Portuguese, and Dutch. Additionally, we searched the bibliographies and citations of 29 reviews and meta-analyses related to the topic. This search for relevant records provided by newly published reviews and meta-analytic work will be repeated before conducting the analyses. Before conducting any analyses, we will add the citations and bibliographies of all included articles to the screening process.

References of reviews and meta-analyses as an additional source:

- Ahmadi Forooshani, S., Izadikhah, Z., Renzaho, A. M. N., & O'Connor, P. J. (2021). Effectiveness of Psychological Interventions on Young Refugees' Social Adjustment: A Meta-Analysis. *Journal of Refugee Studies*, 34(1), 976–992. <https://doi.org/10.1093/jrs/fez035>
- Barbui, C., Purgato, M., Abdulmalik, J., Acarturk, C., Eaton, J., Gastaldon, C., Gureje, O., Hanlon, C., Jordans, M., Lund, C., Nosè, M., Ostuzzi, G., Papola, D., Tedeschi, F., Tol, W., Turrini, G., Patel, V., & Thornicroft, G. (2020). Efficacy of psychosocial interventions for mental health outcomes in low-income and middle-income countries: an umbrella review. *The Lancet Psychiatry*, 7(2), 162–172. [https://doi.org/10.1016/S2215-0366\(19\)30511-5](https://doi.org/10.1016/S2215-0366(19)30511-5)
- Crumlish, N., & O'Rourke, K. (2010). A systematic review of treatments for post-traumatic stress disorder among refugees and asylum-seekers. *Journal of Nervous and Mental Disease*, 198(4), 237–251. <https://doi.org/10.1097/NMD.0b013e3181d61258>
- Gwozdziwycz, N., & Mehl-Madrona, L. (2013). Meta-analysis of the use of narrative exposure therapy for the effects of trauma among refugee populations. *The Permanente Journal*, 17(1), 70–76. <https://doi.org/10.7812/tpp/12-058>
- Hamid, A., Patel, N., & De C Williams, A. C. (2019). Psychological, social, and welfare interventions for torture survivors: a systematic review and meta-analysis of randomised controlled trials. *PLoS Medicine*, 16(9), 1–16. <https://doi.org/10.1371/journal.pmed.1002919>
- Kip, A., Priebe, S., Holling, H., & Morina, N. (2020). Psychological interventions for posttraumatic stress disorder and depression in refugees: A meta-analysis of randomized controlled trials. *Clinical Psychology & Psychotherapy*. <https://doi.org/10.1002/cpp.2446>
- Lambert, J. E., & Alhassoon, O. M. (2015). Trauma-focused therapy for refugees: meta-analytic findings. *Journal of Counseling Psychology*, 62(1), 28–37. <https://doi.org/10.1037/cou0000048>

- McFarlane, C. A., & Kaplan, I. (2012). Evidence-based psychological interventions for adult survivors of torture and trauma: a 30-year review. *Transcultural Psychiatry*, 49(3–4), 539–567. <https://doi.org/10.1177/1363461512447608>
- Nakeyar, C., & Frewen, P. A. (2016). Evidence-based care for Iraqi, Kurdish, and Syrian asylum seekers and refugees of the Syrian civil war: a systematic review. *Canadian Psychology*, 57(4), 235–245. <https://doi.org/10.1037/cap0000067>
- Nickerson, A., Bryant, R. A., Silove, D., & Steel, Z. (2011). A critical review of psychological treatments of posttraumatic stress disorder in refugees. *Clinical Psychology Review*, 31(3), 399–417. <https://doi.org/10.1016/j.cpr.2010.10.004>
- Nocon, A., Eberle-Sejari, R., Unterhitzberger, J., & Rosner, R. (2017). The effectiveness of psychosocial interventions in war-traumatized refugee and internally displaced minors: Systematic review and meta-analysis. *European Journal of Psychotraumatology*, 8(Suppl 2), 1–15. <https://doi.org/10.1080/20008198.2017.1388709>
- Nosè, M., Ballette, F., Bighelli, I., Turrini, G., Purgato, M., Tol, W., Priebe, S., & Barbui, C. (2017). Psychosocial interventions for post-traumatic stress disorder in refugees and asylum seekers resettled in high-income countries: Systematic review and meta-analysis. *PloS One*, 12(2), e0171030. <https://doi.org/10.1371/journal.pone.0171030>
- Patel, N., Kellezi, B., & Williams, A. C. de C. (2014). Psychological, social and welfare interventions for psychological health and well-being of torture survivors. *The Cochrane Database of Systematic Reviews*, 11, CD009317. <https://doi.org/10.1002/14651858.CD009317.pub2>
- Purgato, M., Gastaldon, C., Papola, D., van Ommeren, M., Barbui, C., & Tol, W. A. (2018). Psychological therapies for the treatment of mental disorders in low-and middle-income countries affected by humanitarian crises. *Cochrane Database of Systematic Reviews*, 2018(7). <https://doi.org/10.1002/14651858.CD011849.pub2>
- Robjant, K., & Fazel, M. (2010). The emerging evidence for narrative exposure therapy: A review. *Clinical Psychology Review*, 30(8), 1030–1039. <https://doi.org/10.1016/j.cpr.2010.07.004>
- Rolfnes, E. S., & Idsoe, T. (2007). Prevalence and Psychological Correlates of Complicated. *Journal of Traumatic Stress*, 20(3), 251–262. <https://doi.org/10.1002/jts>
- Sambucini, D., Aceto, P., Begotaraj, E., & Lai, C. (2020). Efficacy of Psychological Interventions on Depression Anxiety and Somatization in Migrants: A Meta-analysis. *Journal of Immigrant and Minority Health*, 22(6), 1320–1346. <https://doi.org/10.1007/s10903-020-01055-w>
- Slobodin, O., & de Jong, J. T. V. M. (2015). Family interventions in traumatized immigrants and refugees: a systematic review. *Transcultural Psychiatry*, 52(6), 723–742. <https://doi.org/10.1177/1363461515588855>
- Sullivan, A. L., & Simonson, G. R. (2016). A systematic review of school-based social-emotional interventions for refugee and war-traumatized youth. *Review of Educational Research*, 86(2), 503–530. <https://doi.org/10.3102/0034654315609419>
- Sykinioti, S. (2019). The effectiveness of eye movement desensitisation and reprocessing with refugees experiencing symptoms of posttraumatic stress disorder. *European Journal of Trauma & Dissociation*, 3(1), 49–55. <https://doi.org/10.1016/j.ejtd.2018.08.001>
- Thompson, C. T., Vidgen, A., & Roberts, N. P. (2018). Psychological interventions for post-traumatic stress disorder in refugees and asylum seekers: a systematic review

- and meta-analysis. *Clinical Psychology Review*, 63, 66–79.  
<https://doi.org/10.1016/j.cpr.2018.06.006>
- Tribe, R. H., Sendt, K.-V., & Tracy, D. K. (2019). A systematic review of psychosocial interventions for adult refugees and asylum seekers. *Journal of Mental Health* (Abingdon, England), 28(6), 662–676.  
<https://doi.org/10.1080/09638237.2017.1322182>
  - Turrini, G., Purgato, M., Acarturk, C., Anttila, M., Au, T., Ballette, F., Bird, M., Carswell, K., Churchill, R., Cuijpers, P., Hall, J., Hansen, L. J., Kösters, M., Lantta, T., Nosè, M., Ostuzzi, G., Sijbrandij, M., Tedeschi, F., Valimaki, M., ...Barbui, C. (2019). Efficacy and acceptability of psychosocial interventions in asylum seekers and refugees: Systematic review and meta-analysis. *Epidemiology and Psychiatric Sciences*, 28(4), 376–388. <https://doi.org/10.1017/S2045796019000027>
  - Turrini, Giulia, Barbui, C., & Nosè, M. (2017). Psychosocial interventions for post-traumatic stress disorder in refugees and asylum seekers. *Rivista Sperimentale Di Freniatria: La Rivista Della Salute Mentale*, 141(3), 51–66.  
<https://doi.org/10.3280/RSF2017-003004>
  - Turrini, Giulia, Tedeschi, F., Cuijpers, P., Del Giovane, C., Kip, A., Morina, N., Nosè, M., Ostuzzi, G., Purgato, M., Ricciardi, C., Sijbrandij, M., Tol, W., & Barbui, C. (2021). A network meta-analysis of psychosocial interventions for refugees and asylum seekers with PTSD. *BMJ Global Health*, 6(6). <https://doi.org/10.1136/bmjgh-2021-005029>
  - Tyrer, R. A., & Fazel, M. (2014). School and community-based interventions for refugee and asylum seeking children: A systematic review. *PLoS ONE*, 9(2).  
<https://doi.org/10.1371/journal.pone.0089359>
  - van Wyk, S., & Schweitzer, R. D. (2014). A Systematic Review of Naturalistic Interventions in Refugee Populations. *Journal of Immigrant and Minority Health*, 16(5), 968–977. <https://doi.org/10.1007/s10903-013-9835-3>
  - Williams, M. E., & Thompson, S. C. (2011). The use of community-based interventions in reducing morbidity from the psychological impact of conflict-related trauma among refugee populations: A systematic review of the literature. *Journal of Immigrant and Minority Health*, 13(4), 780–794. <https://doi.org/10.1007/s10903-010-9417-6>
  - Wright, A., Reisig, A., & Cullen, B. (2020). Efficacy and cultural adaptations of narrative exposure therapy for trauma-related outcomes in refugees/asylum-seekers: A systematic review and meta-analysis. *Journal of Behavioral and Cognitive Therapy*, 30(4), 301–314. <https://doi.org/10.1016/j.jbct.2020.10.003>

#### Search strings

- Embase  
 Advanced search - ALL FIELDS:  
*(refugee\* OR 'asylum seeker\*' OR 'forcibly displaced' OR 'forced displacement' OR 'internally displaced' OR 'civilian war survivor\*' OR 'civilian survivor\*' OR 'civilian war victim\*') AND (treatment\* OR intervention\* OR therap\* OR psychother\* OR counsel\* OR behavio\* OR psycholog\* OR psychosoci\* OR program\* OR low) AND (pts OR 'post-traumatic stress' OR ptsd OR 'post-traumatic stress disorder' OR 'post-traumatic symptom\*' OR 'mental health' OR 'mental illness' OR 'mental disorder' OR 'mental distress' OR 'emotion\* distress' OR 'psycho\* distress' OR*

*anxiety OR depression OR mdd) AND (rct OR random\* OR trial\* OR controlled OR allocat\* OR assign\*)*

- Cochrane

Advanced search – Title Abstract Keywords:

*(refugee\* OR "asylum seeker\*" OR "forcibly displaced" OR "forced displacement" OR "internally displaced" OR "civilian war survivor\*" OR "civilian survivor\*" OR "civilian war victim\*") AND (treatment\* OR intervention\* OR therap\* OR psychother\* OR counsel\* OR behavio\* OR psycholog\* OR psychosoci\* OR program\* OR low) AND (PTS OR "post-traumatic stress" OR PTSD OR "post-traumatic stress disorder" OR "post-traumatic symptom\*" OR "mental health" OR "mental illness" OR "mental disorder" OR "mental distress" OR "emotion\* distress" OR "psycho\* distress" OR anxiety OR depression OR MDD) AND (RCT OR random\* OR trial\* OR controlled OR allocat\* OR assign\*)*

- PTSDpubs

Advanced search – Anywhere:

*(refugee\* OR "asylum seeker\*" OR "forcibly displaced" OR "forced displacement" OR "internally displaced" OR "civilian war survivor\*" OR "civilian survivor\*" OR "civilian war victim\*") AND (treatment\* OR intervention\* OR therap\* OR psychother\* OR counsel\* OR behavio\* OR psycholog\* OR psychosoci\* OR program\* OR low) AND (PTS OR "post-traumatic stress" OR PTSD OR "post-traumatic stress disorder" OR "post-traumatic symptom\*" OR "mental health" OR "mental illness" OR "mental disorder" OR "mental distress" OR "emotion\* distress" OR "psycho\* distress" OR anxiety OR depression OR MDD) AND (RCT OR random\* OR trial\* OR controlled OR allocat\* OR assign\*)*

- Medline

Advanced search - Select a field (optional):

*( refugee\* OR "asylum seeker\*" OR "forcibly displaced" OR "forced displacement" OR "internally displaced" OR "civilian war survivor\*" OR "civilian survivor\*" OR "civilian war victim\*" ) AND ( treatment\* OR intervention\* OR therap\* OR psychother\* OR counsel\* OR behavio\* OR psycholog\* OR psychosoci\* OR program\* OR low ) AND ( PTS OR "post-traumatic stress" OR PTSD OR "post-traumatic stress disorder" OR "post-traumatic symptom\*" OR "mental health" OR "mental illness" OR "mental disorder" OR "mental distress" OR "emotion\* distress" OR "psycho\* distress" OR anxiety OR depression OR MDD ) AND ( RCT OR random\* OR trial\* OR controlled OR allocat\* OR assign\* )*

- PsycINFO

Advanced search - Select a field (optional):

*( refugee\* OR "asylum seeker\*" OR "forcibly displaced" OR "forced displacement" OR "internally displaced" OR "civilian war survivor\*" OR "civilian survivor\*" OR "civilian war victim\*" ) AND ( treatment\* OR intervention\* OR therap\* OR psychother\* OR counsel\* OR behavio\* OR psycholog\* OR psychosoci\* OR program\* OR low ) AND ( PTS OR "post-traumatic stress" OR PTSD OR "post-traumatic stress disorder" OR "post-traumatic symptom\*" OR "mental health" OR "mental illness" OR "mental disorder" OR "mental distress" OR "emotion\* distress" OR "psycho\* distress" OR anxiety OR depression OR MDD ) AND ( RCT OR random\* OR trial\* OR controlled OR allocat\* OR assign\* )*
